14 **Abstract**

15 Biological nitrogen fixation in rhizobium-legume symbioses is of major importance for  
16 sustainable agricultural practices. To establish a mutualistic relationship with their  
17 plant host, rhizobia transition from free-living bacteria in soil to growth down infection  
18 threads inside plant roots and finally differentiate into nitrogen-fixing bacteroids. We  
19 reconstructed a genome-scale metabolic model for *Rhizobium leguminosarum* and  
20 integrated the model with transcriptome, proteome, metabolome and gene  
21 essentiality data to investigate nutrient uptake and metabolic fluxes characteristic of  
22 these different lifestyles. Synthesis of leucine, polyphosphate and AICAR is  
23 predicted to be important in the rhizosphere, while *myo*-inositol catabolism is active  
24 in undifferentiated nodule bacteria in agreement with experimental evidence. The  
25 model indicates that bacteroids utilize xylose and glycolate in addition to  
26 dicarboxylates, which could explain previously described gene expression patterns.  
27 Histidine is predicted to be actively synthesized in bacteroids, consistent with  
28 transcriptome and proteome data for several rhizobial species. These results provide  
29 the basis for targeted experimental investigation of metabolic processes specific to  
30 the different stages of the rhizobium-legume symbioses.

31 **Importance**

32 Rhizobia are soil bacteria that induce nodule formation on plant roots and  
33 differentiate into nitrogen-fixing bacteroids. A detailed understanding of this complex  
34 symbiosis is essential for advancing ongoing efforts to engineer novel symbioses  
35 with cereal crops for sustainable agriculture. Here, we reconstruct and validate a  
36 genome-scale metabolic model for *Rhizobium leguminosarum* bv. *viciae* 3841. By  
37 integrating the model with various experimental datasets specific to different stages  
38 of symbiosis formation, we elucidate the metabolic characteristics of rhizosphere  
39 bacteria, undifferentiated bacteria inside root nodules, and nitrogen-fixing bacteroids.  
40 Our model predicts metabolic flux patterns for these three distinct lifestyles, thus  
41 providing a framework for the interpretation of genome-scale experimental datasets  
42 and identifying targets for future experimental studies.

## 43 **Introduction**

44 Nitrogen is commonly the main limiting nutrient in agriculture because plants are  
45 unable to assimilate atmospheric N<sub>2</sub> (1). Some legumes, such as peas, beans and  
46 lentils, circumvent this problem by entering into complex symbiotic relationships with  
47 soil bacteria called rhizobia. Legumes secrete signaling molecules (flavonoids) that  
48 are recognized by compatible rhizobia, which produce their own signaling molecules  
49 (Nod factors) in response. As a result of this signal exchange, rhizobia are typically  
50 entrapped by root hairs and grow down so-called infection threads until they are  
51 endocytosed by plant cells in the developing nodule. The bacteria then undergo  
52 further cell division and eventually differentiate into bacteroids converting  
53 atmospheric N<sub>2</sub> into ammonia, which is secreted to the plant host in exchange for  
54 carbon sources, mainly dicarboxylates (2–4).

55 Symbiosis formation is a multi-stage process, requiring distinct metabolic capabilities  
56 at each stage. The ability of rhizobia to adapt to various environmental conditions is  
57 reflected in their large genomes, which often comprise several replicons (5–7), and  
58 in the importance of different genomic regions for each lifestyle (8, 9). While  
59 significant research efforts have focused on understanding bacteroid metabolism in  
60 rhizobium-legume symbioses, several recent studies have begun to unravel the  
61 plant-bacteria interactions preceding the formation of differentiated nitrogen-fixing  
62 bacteroids. For example, transcriptomic changes in response to root exudates of  
63 different plants have been investigated (10, 11) and biosensors have been  
64 developed to elucidate nutrient availability in the rhizosphere (12). Importantly, a  
65 study using transposon-based insertion sequencing (INSeq) assessed gene  
66 essentiality in *Rhizobium leguminosarum* for rhizosphere bacteria, root-attached

67 bacteria, undifferentiated nodule bacteria and nitrogen-fixing bacteroids (13). It was  
68 found that 603 genetic regions were essential for a successful transition from free-  
69 living bacteria to bacteroids, highlighting the complexity of development during  
70 formation of a successful symbiosis. Understanding the metabolic features at  
71 different stages of symbiosis is required for developing effective rhizobial inocula for  
72 agricultural applications. Rhizobia that efficiently fix nitrogen are not necessarily  
73 adapted to persistence in the rhizosphere as well as nodulating a plant host in the  
74 presence of genetically different bacterial strains, a characteristic described as  
75 competitiveness (13–15). Knowledge of the nutrient exchanges between plants and  
76 rhizosphere bacteria is thus required for the design of microbial inocula that are  
77 competitive and stably persist when applied in the field (14, 16). Once rhizobia have  
78 successfully entered the plant root, elucidating the metabolism of undifferentiated  
79 rhizobia inside the nodule is also important to avoid delays in the onset of nitrogen  
80 fixation.

81 Due to the complexity of nutrient exchanges in symbioses, metabolic modelling has  
82 become a popular tool for investigating rhizobium-legume interactions (3, 17).

83 Metabolic models describe the reactions that are catalyzed by the enzymes  
84 annotated in an organism's genome (18, 19). By defining nutrient availability as well  
85 as an objective function reflecting the metabolic strategy of the organism, flux  
86 distributions at steady state can be calculated using flux balance analysis (20). Due  
87 to the gene-protein-reaction associations contained in metabolic models, they also  
88 provide a convenient framework for contextualizing genome-scale data obtained by  
89 omics technologies, such as transcriptomics or proteomics (21). Most metabolic  
90 models of rhizobial species so far have focused on fully differentiated bacteroids

91 (22–25). One *in silico* study of *Sinorhizobium meliloti* has addressed the differences  
92 in metabolism for free-living growth in the bulk soil, growth the rhizosphere, and  
93 symbiotic nitrogen fixation during the bacteroid stage (9). However, this study  
94 focused on the contributions of the different replicons to fitness in the different  
95 environments rather than specifics of changes in metabolic flux distributions and did  
96 not integrate experimental data. Another study compared the metabolism of free-  
97 living *Bradyrhizobium japonicum* with bacteroids (26). While transcriptome and  
98 proteome datasets were used to generate models for rhizosphere bacteria and  
99 bacteroids, the data for the rhizosphere model were obtained for bacteria grown in a  
100 laboratory culture. Only one recent study has addressed metabolic differences in the  
101 different nodule zones for the symbiosis between *S. meliloti* and *Medicago truncatula*  
102 (27).

103 In this study, we reconstruct and extensively curate a genome-scale metabolic model  
104 (GSM) for *R. leguminosarum* bv. *viciae* 3841 (Rlv3841). Various experimental  
105 datasets exist for this strain at different stages of symbiosis with its native host pea.  
106 By integrating transcriptome, proteome and gene essentiality data with the GSM, we  
107 perform a detailed investigation of nutrient uptake and metabolic pathway usage of  
108 Rlv3841 in the rhizosphere, as nodule bacteria and as nitrogen-fixing bacteroids.  
109 This genome-scale approach for data integration reproduced experimentally  
110 observed phenotypes and particularly highlighted the role of different carbon sources  
111 and amino acids throughout the different stages of symbiosis. The metabolic model  
112 developed herein provides a valuable resource for targeted investigation of  
113 metabolic requirements of the different rhizobial lifestyles and may enable the

114 identification of strategies for engineering strains that are metabolically advantaged  
115 at all stages of symbiosis formation.

116

## 117 **Results**

### 118 **Reconstruction of a genome-scale metabolic model for *Rhizobium*** 119 ***leguminosarum***

120 Most published metabolic models for rhizobia focus on bacteroids and are therefore  
121 limited to metabolic pathways active during nitrogen fixation. Curated genome-scale  
122 reconstructions are so far only available for *B. japonicum* (26) and *S. meliloti* (27).

123 With the aim of investigating metabolism in the rhizosphere and during different  
124 stages of bacteroid development, we developed a GSM for Rlv3841 using multiple  
125 sources of information. As shown in Fig. 1A, automated reconstructions based on  
126 the KEGG (28) and MetaCyc (29) databases were combined with a homology-based  
127 reconstruction using a GSM for *S. meliloti* as a template and reactions from our  
128 previously reconstructed bacteroid model of Rlv3841 (23) (Fig. 1B). Extensive  
129 curation was then performed based on literature evidence, gene essentiality data  
130 (13, 30) and enzymatic functions predicted by DeepEC (31). Comparison with  
131 iML1515, a high-quality model for *Escherichia coli* (32) as well as the CarveMe  
132 template for Gram-negative bacteria (33) was further used to correct reaction  
133 stoichiometry and reversibility if required. We next defined a biomass function based  
134 on evidence from the literature (Table S1). Since our previous work showed the  
135 dependence of carbon polymer synthesis on environmental conditions (23), demand  
136 reactions for polymers such as glycogen, polyhydroxybutyrate (PHB) and  
137 exopolysaccharides were included in the model to allow for their flexible

138 accumulation. The final model (Supplementary Data 1 and 2) contained 1224 genes,  
139 1257 reactions and 984 metabolites (Table 1), and was named iCS1224 according to  
140 standard naming conventions. The largest groups of metabolic reactions were  
141 associated with amino acid and lipid metabolism (14.1% and 13.5% of model  
142 reactions, respectively), followed by cofactor metabolism (10.7%) and  
143 purine/pyrimidine metabolism (9.0%) (Fig. 1C). Cluster of orthologous genes (COG)  
144 (34) analysis of the model genes showed that all COG categories associated with  
145 metabolic reactions were represented in iCS1224 (Fig. S1). The quality of the  
146 reconstruction was evaluated using MEMOTE (35), where iCS1224 achieved an  
147 overall score of 89% (Supplementary Data 3).

148

#### 149 **Model validation**

150 We validated our model for free-living Rlv3841 growing in minimal media using  
151 various experimental datasets. First, we experimentally assessed growth on 190  
152 different carbon sources using phenotype microarrays (36) (Supplementary Data 4).  
153 For the 109 carbon sources that were present as metabolites in iCS1224, an overall  
154 predictive accuracy of 89.9% with 90.9% precision and 96.4% recall was achieved  
155 (Fig. 2A), which is similar to the performance of curated GSMs for well-investigated  
156 bacteria, such as *Pseudomonas aeruginosa* (37) or *E. coli* (38). In addition, we  
157 evaluated the quality of gene essentiality predictions by comparing *in silico* gene  
158 essentiality with the results of an INSeq gene essentiality screen of Rlv3841  
159 performed in minimal media supplemented with succinate and ammonia (30). Since  
160 the classification of genes based on transposon mutagenesis screen is subject to  
161 some variability (39), the list of essential genes was further curated by comparison



162 with INSeq data for growth on complex media (13). Predictions by iCS1224 achieved  
163 an accuracy, precision and recall of 91.0%, 89.6% and 87.8%, respectively (Fig. 2B),  
164 thus showing good agreement with the INSeq data and indicating high quality of the  
165 gene-protein-reaction associations as well as suitability of the biomass objective  
166 function.

167 Finally, we performed quantitative validation of our model by comparing the  
168 predicted flux values for 17 reactions involved in central carbon metabolism with  
169 published values measured by <sup>13</sup>C metabolic flux analysis of Rlv3841 grown in  
170 minimal media with succinate and ammonia (40). As shown in Fig. 2C, we observed  
171 excellent agreement between predicted and experimentally measured flux values. In  
172 all cases, the measured flux was within the range determined by flux variability  
173 analysis. iCS1224 thus appears to be an accurate representation of the metabolism  
174 of Rlv3841, both qualitatively and quantitatively.

175

## 176 **Metabolism of rhizosphere bacteria**

177 Having validated the predictive capabilities of iCS1224, we sought to extract  
178 condition-specific models for metabolism of Rlv3841 (i) in the rhizosphere, (ii) as  
179 undifferentiated nodule bacteria and (iii) as nitrogen-fixing bacteroids (Fig. 3). We  
180 chose the recently developed RIPTiDe algorithm (41) to obtain condition-specific  
181 metabolic models. Based on gene expression data, RIPTiDe assigns weights to all  
182 gene-associated reactions, assuming that higher transcript abundance makes it  
183 more likely that the corresponding reaction is used in a certain environmental  
184 condition. The overall flux through the network is then minimized and inactive  
185 reactions are removed. Finally, flux sampling of the solution space is performed,

186 where flux through reactions associated with highly expressed genes is favored. In  
187 contrast to other methods for transcriptome data integration, RIPTiDe does not  
188 impose arbitrary thresholds on the gene expression data, it produces functional  
189 models with flux through the objective reaction, and takes flux parsimony into  
190 account, i.e., the overall flux is minimized to find cost-efficient solutions (41).  
191 Generation of a rhizosphere-specific model thus required information about available  
192 nutrients as well as gene expression data. Nutrient availability in the rhizosphere is  
193 mainly determined by plant root exudates, and plants modulate the composition of  
194 their root exudates to select for specific soil microbes (42, 43). However, only a  
195 subset of metabolites is used by the soil microbiota (44, 45), and elucidation of  
196 nutrient uptake by rhizosphere bacteria usually requires extensive metabolomics  
197 profiling (46, 47). Taking a top-down approach for defining the rhizosphere  
198 environment, we first compiled a list of compounds present in pea root exudates  
199 based on published experimental data (10, 12, 48, 49) (Table S2 and S3,  
200 Supplementary Text). For those compounds that could be matched to model  
201 metabolites, exchange reactions were added to the model with reaction bounds set  
202 to allow for unlimited uptake. RNA-Seq data for Rlv3841 in the rhizosphere of pea  
203 plants 7 days post inoculation (Supplementary Data 5) was used as an input dataset  
204 for model contextualization. In addition, a list of genes that were classified as  
205 essential or defective in the rhizosphere in an INSeq screen (13) was provided to  
206 prevent removal of reactions associated with these genes from the rhizosphere-  
207 specific model. Biomass production was set as the objective and additional positive  
208 lower bounds were placed on exopolysaccharide, lipopolysaccharide and Nod factor  
209 synthesis, all of which are known to be important in the rhizosphere (4). During data

210 integration, constraining flux through the objective function to values between 50%  
211 and 95% of its maximum was tested to identify the scenario that gave the best match  
212 with the transcriptome data. Within the range of objective values tested, the highest  
213 correlation (Spearman's  $Rho=0.237$ ,  $P<0.001$ ) between metabolic fluxes and  
214 transcript abundances was obtained with the biomass reaction constrained to carry  
215 at least 77.5% of its maximum flux, and the rhizosphere-specific model contained  
216 606 reactions and 576 metabolites (Supplementary Data 6). Remarkably, out of the  
217 134 nutrients available for uptake before data integration, only 51 were present in the  
218 rhizosphere-specific model.

219 For the analysis of the contextualized model, we focused on those metabolic  
220 pathways that are either not universally essential or that are retained in the model  
221 despite their end product being available for uptake from the environment. Pathways  
222 such as membrane lipid or PHB synthesis, for instance, will always be retained in the  
223 model, since they are required to maintain flux through the biomass objective  
224 function and uptake of lipids and PHB is not possible. In addition, we limit our  
225 discussion to reactions that had a non-zero median flux value based on the flux  
226 sampling results, since those reactions are most likely to be active in the  
227 rhizosphere. The TCA cycle was predicted to be a central catabolic pathway (Fig. 4),  
228 which is consistent with previous reports of organic acids being the predominant  
229 carbon sources for rhizobia in the rhizosphere (9, 10). In particular, the model  
230 predicted high uptake of glycolate in agreement with the induction of C2 metabolism  
231 observed in previous gene expression studies (10). Glycolate was converted into  
232 pyruvate via glycolate oxidase and an aminotransferase. The model also showed  
233 high uptake rates for aspartate, which could explain the induction of a *dctA* biosensor

234 in Rlv3841 in the pea rhizosphere (12). Aspartate and 2-oxoglutarate were  
235 transaminated to produce glutamate and oxaloacetate, which is a TCA cycle  
236 intermediate.

237 In addition to organic acids, amylotriose, which is hydrolyzed into glucose, was partly  
238 metabolized via the Entner-Doudoroff pathway and glycolysis in the model and  
239 entered the pentose phosphate pathway to enable production of nucleotides required  
240 for the synthesis of various polysaccharides and Nod factors. The solute-binding  
241 protein of a carbohydrate uptake transporter-1 (CUT1) family transporter (RL3840)  
242 was 2.6-fold upregulated in the pea rhizosphere compared to free-living cells (10),  
243 which supports the predicted uptake of a di- or oligosaccharide. Ribulose, a  
244 monosaccharide metabolized via the pentose phosphate pathway was also predicted  
245 to be taken up. Catabolism of a monosaccharide in the rhizosphere is highly  
246 probable considering the strong signals of a fructose and a xylose biosensor in the  
247 pea rhizosphere (12). The fructose biosensor is based on the solute-binding protein  
248 of the CUT2 family *frcABC* transporter, which has been shown to transport ribose in  
249 addition to fructose in *S. meliloti* (50) and may therefore also contribute to pentose  
250 uptake in the rhizosphere. The model further contained reactions for glycerol uptake  
251 and catabolism, which could explain the decreased competitiveness observed for a  
252 glycerol catabolism mutant of *R. leguminosarum* bv. *viciae* VF39 (51).

253 With regard to amino acids, all of which are present in root exudates, biosynthetic  
254 pathways were generally retained in the rhizosphere model due to the essentiality of  
255 the associated genes. Low levels of uptake were however predicted for most amino  
256 acids, mainly to support protein synthesis. Notably, the biosynthetic pathway for  
257 leucine was predicted to be active, which was partly supported by uptake of 2-

258 isopropylmalate, an intermediate of branched-chain amino acid synthesis. The need  
259 for leucine synthesis in the rhizosphere agrees with a *leuD* mutant of Rlv3841  
260 requiring the addition of 1 mM leucine to nodulate pea (52). Mutation of the  
261 isopropylmalate synthase gene in *S. meliloti* impaired nodulation even in the  
262 presence of leucine, and it was shown that either isopropylmalate synthase or  
263 intermediates of the leucine biosynthetic pathway are required for the activation of  
264 *nod* gene expression (53). It is therefore possible that the predicted leucine synthesis  
265 is at least partly related to the synthesis of Nod factors in the rhizosphere. High  
266 uptake rates were further predicted for glutamine, which is consistent with its high  
267 concentration in pea root exudates (49). Glutamine was converted into glutamate,  
268 which was mostly used to sustain leucine synthesis. The model also contained active  
269 uptake reactions for several nucleotides. This agrees with the reported uptake of  
270 nucleosides and nucleotides by rhizosphere bacteria (44, 47, 54) and agrees with  
271 the gene essentiality predictions for rhizosphere bacteria obtained by INSeq, where  
272 purine auxotrophs appear to be rescued by plant root exudates (13).

273 Among biomass components that are present in root exudate but not predicted to be  
274 taken up, biosynthesis of the polyamine putrescine was retained in the model,  
275 attesting to the ability of the RIPTiDe algorithm to choose metabolic reactions that  
276 agree with gene expression and/or essentiality rather than choosing the least  
277 resource-intensive solution. Putrescine and related polyamines are important for  
278 survival under stress conditions and their synthesis has been suggested to play an  
279 important role during root colonization (55). As part of the model reconstruction,  
280 several demand reactions were included for compounds such as carbon polymers  
281 whose accumulation can vary with environmental conditions. The only non-essential

282 demand reactions that were not removed during the pruning process were those for  
283 glutathione and polyphosphate, where polyphosphate synthesis in particular had a  
284 non-zero median flux. Glutathione is important to deal with stress conditions, such as  
285 osmotic and oxidative stress, encountered in the rhizosphere, and mutants in  
286 glutathione biosynthesis are severely affected in rhizosphere colonization (56). The  
287 predicted catabolism of glycolate via glyoxylate produces the reactive oxygen  
288 species hydrogen peroxide, which could contribute to the need for glutathione  
289 synthesis. Polyphosphate has recently been suggested to play a role in the global  
290 carbon regulatory system (57), but its function remains to be investigated in detail. It  
291 is interesting to note that an exopolyphosphatase gene (RL1600) was classified as  
292 essential for persistence in the rhizosphere (13), indicating an important role for  
293 phosphate homeostasis in rhizosphere colonization and/or competition.

294 Catabolism of several other compounds, such as erythritol, *myo*-inositol and  
295 homoserine, has been described to be important for competitiveness (10, 58, 59),  
296 however, these compounds were not included in the rhizosphere model. This could  
297 be due to the catabolism of these compounds being important at later stages of the  
298 symbiosis, e.g. for growth in infection threads rather than in the rhizosphere.

299 Alternatively, uptake of these compounds could be masked in the model due to  
300 catabolic routes that are shared with other metabolites. For example, erythritol is  
301 metabolized via the pentose phosphate pathway (60), hence the predicted uptake  
302 and metabolism of ribulose could partly be due to erythritol catabolism.

### 303 **Reporter metabolites highlight plant-specific rhizosphere metabolism**

304 As an independent validation and extension of our analysis of metabolic changes,  
305 we identified reporter metabolites using previously published microarray data  
306 comparing Rlv3841 in the rhizosphere of pea plants with free-living cells grown on  
307 minimal media with glucose and ammonium chloride (10). Based on the network  
308 topology defined by a metabolic model, the reporter metabolite algorithm identifies  
309 those compounds around which significant changes in gene expression occur (61).  
310 This method is therefore independent of specifying nutrient uptake from the  
311 environment. Reporter metabolites associated with upregulated genes matched  
312 several observations from the RNA-Seq data integration described in the previous  
313 section. In particular, several intermediates of branched-chain amino acid synthesis,  
314 such as acetolactate, 2-hydroxyethyl-thiamin diphosphate and 2-aceto-2-  
315 hydroxybutanoate, were identified as reporter metabolites (Fig. 5A). Significant  
316 transcriptional changes were also observed around various nucleobase derivatives.  
317 This may be related to their predicted uptake from plant root exudates but could also  
318 indicate an increased need for nucleotide synthesis for the production of  
319 polysaccharides and Nod factor. Phosphoribosyl-AMP and  
320 phosphoribosylformiminoaicar-phosphate are intermediates of histidine biosynthesis  
321 and direct precursors of AICAR, which is involved in purine metabolism. Seeing as  
322 no additional metabolites of the histidine biosynthetic pathway were identified as  
323 reporter metabolites, this analysis indicates an increase in AICAR synthesis, which  
324 seems to be required for successful legume infection by various *Rhizobium* species  
325 (62).

326 Comparison of the rhizosphere reporter metabolites for pea (host legume for  
327 Rlv3841) with those for alfalfa (non-host legume) (Fig. 5B) and sugar beet (non-  
328 legume) (Fig. 5C) highlighted several plant-specific features. For alfalfa,  
329 phosphoribosyl-AMP was identified as a reporter metabolite similar to pea. In  
330 addition, phenylalanine and tyrosine support the role of aromatic amino acid  
331 metabolism in colonization competitiveness (10). Significant transcriptional changes  
332 also occurred around the carbon polymer beta-glucan and the diamine putrescine.  
333 While beta-glucan generally appears to be important for persistence in the  
334 rhizosphere (10, 13), its identification as a reporter metabolite together with  
335 putrescine indicates increased osmotic stress in the alfalfa rhizosphere compared to  
336 pea. For sugar beet, the identification of several compounds involved in nitrogen  
337 metabolism (ammonia, urea, urate) agrees with the suggested nitrogen limitation in  
338 the sugar beet rhizosphere, but nitrogen sufficiency in legume rhizospheres (10).  
339 This could also explain why the carbon polymer glycogen was a reporter metabolite  
340 specifically in the sugar beet rhizosphere, since glycogen synthesis is probably  
341 linked to nitrogen limitation (63). Notably, multiple mono- and disaccharides and their  
342 derivatives indicate an increased importance of sugar metabolism compared to  
343 legume rhizospheres. However, many genes involved in saccharide metabolism are  
344 associated with multiple reactions (e.g. unspecific glucoside hydrolases), and  
345 therefore the identity of the metabolized sugar cannot be derived from this analysis.  
346 Finally, the reporter metabolites 3-dehydrocarnitine and betainyl-CoA indicate either  
347 accumulation of amines for osmoprotection or catabolism of carnitine or related  
348 amines. These findings present interesting targets for future investigations using  
349 gene essentiality screens on different plant hosts.



350 Overall, both the context-specific model obtained by transcriptome data integration  
351 and the reporter metabolite analysis were in good agreement with experimental data  
352 for rhizobial metabolism in the rhizosphere without forcing the uptake of any  
353 compound through arbitrary constraints. Instead, insights into nutrient uptake were  
354 facilitated by the integration of gene expression and gene essentiality data with  
355 iCS1224. If biomass production were simply maximized with unlimited availability of  
356 all root exudate compounds, this would result in uptake of all available compounds  
357 that are required for biomass formation, which would not reflect a biologically  
358 meaningful scenario.

359

### 360 **Metabolism of undifferentiated nodule bacteria**

361 We next sought to develop models for Rlv3841 inside the nodule environment. For  
362 this purpose, it is important to differentiate between nodule bacteria at the tip of the  
363 nodule, which are dividing and undergoing differentiation, and bacteroids in the  
364 central nitrogen fixation zone of the nodule (64). While nodule bacteria are still  
365 dividing, bacteroids are growth-arrested and mainly catabolize plant-provided  
366 dicarboxylates to fix atmospheric N<sub>2</sub> into ammonia. The distinction between these  
367 developmental stages is required in the context of gene essentiality analyses since  
368 genes required for the differentiation process may not be essential for nitrogen  
369 fixation and vice versa. Similar to the approach for the rhizosphere model, we used  
370 RIPTiDe to obtain models for nodule bacteria and bacteroids and performed flux  
371 sampling to identify those reactions that are most likely to be active in each  
372 contextualized model.

373 The model for nodule bacteria was obtained using published dRNA-Seq data for  
374 RNA extracted from nodule tips (65), as well as a list of genes that were predicted to  
375 be specifically essential for nodule bacteria (13). Nutrient availability was defined  
376 based on a study using biosensors to detect metabolites inside nodules (12) and our  
377 direct measurement of metabolites in pea root exudate, in pea bacteroids and in the  
378 nodule cytosol as described previously (40) (Table S4 and S5, Supplementary Data  
379 7). The biomass objective function was used to account for the cell division occurring  
380 as rhizobia grow down infection threads and differentiate into bacteroids and positive  
381 lower bounds were placed on demand reactions for exopolysaccharides and  
382 lipopolysaccharides. The nodule bacteria model contained 510 reactions and 502  
383 metabolites and achieved highest correlation with the transcriptome data  
384 (Spearman's  $Rho=0.335$ ,  $P<0.001$ ) when the objective value was constrained to  
385 65% of its maximum (Supplementary Data 8). The observation that higher correlation  
386 was obtained for lower flux through the objective reaction (compared to the  
387 rhizosphere) indicates that the metabolism of nodule bacteria is not oriented towards  
388 maximum growth. This agrees with experimental data showing that growth of  
389 infection threads proceeds at highly variable rates controlled by the plant host (66).  
390 The improved correlation of flux predictions and gene expression data compared to  
391 the rhizosphere model can be explained by the lower number of essential genes,  
392 which places fewer constraints on the reactions included in the contextualized  
393 model.  
394 Malate, fructose, xylose, *myo*-inositol and  $\gamma$ -aminobutyrate (GABA) were all predicted  
395 to be taken up by nodule bacteria (Figs. 6A and S2). Biosensors for these carbon  
396 sources were strongly induced in young nodules, whereas biosensors for the carbon

397 sources that were removed during the data integration process (erythritol, mannitol,  
398 formate, malonate, tartrate) only showed weak induction (12). Malate and GABA are  
399 both catabolized in the TCA cycle, indicating that it is an important catabolic route in  
400 differentiating nodule bacteria despite transport of dicarboxylates being non-essential  
401 for differentiation into bacteroids (67). Enzymes involved in GABA metabolism are  
402 highly induced in bacteroids, although GABA catabolism is not essential for effective  
403 nitrogen fixation (68). The predicted catabolism of fructose is consistent with the  
404 strong induction of a fructose-specific biosensor in nodules (12) as well as a previous  
405 modelling study of *S. meliloti* suggesting the use of sucrose-derived sugars as a  
406 carbon source by differentiating nodule bacteria (27). Sucrose uptake was removed  
407 from the nodule bacteria model, which may be due to the inability of the model to  
408 accurately distinguish between sucrose and fructose uptake based on the gene  
409 expression data. It is interesting to note that Rlv3841 bacteroids mutated in a subunit  
410 of succinyl-CoA synthetase, which had severely reduced nitrogen fixation capacity,  
411 had 168-fold higher levels of fructose than wild-type bacteroids and 151-fold  
412 elevated levels of sucrose (Supplementary Data 7), which may be the result of  
413 carbon source build-up in the developmentally impaired nodule bacteria and  
414 bacteroids. *Myo*-inositol is present in the rhizosphere (12) and abundant in pea  
415 nodules (69), and mutants in *myo*-inositol catabolism have strongly reduced  
416 competitiveness compared to wild-type Rlv3841 (58). However, the activity of  
417 enzymes involved in *myo*-inositol catabolism is very low in mature bacteroids (69),  
418 and mutants in *myo*-inositol catabolism were not disadvantaged during growth in the  
419 rhizosphere compared to wild-type Rlv3841 (58). In addition, it has been proposed  
420 that catabolism of rhizopines, which are inositol derivatives, by undifferentiated

421 nodule bacteria may be important as a kin selection strategy (70). Catabolism of  
422 *myo*-inositol is therefore most likely to play a role during infection and in  
423 undifferentiated nodule bacteria, which is correctly predicted by the model. Xylose  
424 enters the pentose phosphate pathway, and its predicted uptake could be related to  
425 the importance of nucleotide synthesis, both for DNA endoreduplication and  
426 synthesis of exopolysaccharides and lipopolysaccharides. Similarly, uptake reactions  
427 for the nucleoside guanosine and uridine as well as the nucleobase adenine were  
428 present in the model.

429 Our nodule bacteria model predicted uptake of most amino acids, which agrees with  
430 the severe symbiotic defect of a *gltB* mutant unable to transport amino acids (71) but  
431 may also be a result of a beginning general downregulation of biosynthetic functions  
432 as rhizobia transition into growth-arrested bacteroids. Similar to the rhizosphere  
433 bacteria, leucine was predicted to be synthesized from 2-isopropylmalate.  
434 Expression of *nod* genes is elevated in nodule bacteria at 7 days post inoculation  
435 (72), which could explain the predicted leucine synthesis as discussed for the  
436 rhizosphere model.

437

### 438 **Metabolism of bacteroids**

439 To extract a model specific for nitrogen-fixing bacteroids, we used dRNA-Seq data  
440 derived from the middle of nodules (65), which contains fully differentiated bacteroids  
441 performing nitrogen fixation (64). In addition, a list of 38 genes that were present in  
442 the model and encoded proteins significantly upregulated in bacteroids compared to  
443 free-living bacteria (23) and the *dct* genes (73) were specified to ensure inclusion of  
444 those genes in the bacteroid model. Nitrogenase activity was set as the objective

445 function while low levels of protein and fatty acid production were enforced through  
446 demand reactions. Nutrient availability was specified similar to the considerations for  
447 nodule bacteria (Table S6). Gene essentiality data from the INSeq screen were not  
448 included for model contextualization due to the aforementioned difficulty of  
449 determining the developmental stage where a gene is essential inside the nodule  
450 environment. The bacteroid model contained 307 reactions and 308 metabolites  
451 (Supplementary Data 9) and achieved significant correlation with the transcriptome  
452 data (Spearman's  $Rho=0.348$ ,  $P<0.001$ ) when nitrogenase activity was constrained  
453 to 65% of its maximum. The reduced model size compared to both the rhizosphere  
454 and the nodule bacteria model is in agreement with the reduced physiological  
455 complexity of the non-dividing bacteroids (3, 72).

456 The bacteroid model contained the C4 dicarboxylates malate, succinate and  
457 fumarate as the main carbon sources in agreement with experimental evidence (67,  
458 74) (Figs. 6B and S3), and only low levels of GABA uptake were predicted. Ammonia  
459 was the only nitrogenous export product. Consistent with our previous modelling  
460 study of Rlv3841 bacteroids (23), constraining the oxygen uptake prior to data  
461 integration resulted in nitrogen partly being secreted as alanine. With the metabolites  
462 provided in initial simulations, the glyoxylate cycle comprising isocitrate lyase and  
463 malate synthase was contained in the model, which is consistent with the high  
464 induction of malate synthase (72) but disagrees with the lack of isocitrate lyase  
465 activity in pea bacteroids (75). The source of glyoxylate for the malate synthase  
466 reaction has so far not been elucidated. Because the metabolomics data showed  
467 that glycolate is present in the nodule cytosol and glycolate concentrations in  
468 bacteroids are 2-fold elevated compared to free-living cells (Supplementary Data 7),

469 we allowed for glycolate uptake by the bacteroid model and inactivated the isocitrate  
470 lyase reaction. This resulted in substantial uptake of glycolate, which was converted  
471 into glyoxylate that was used in the malate synthase reaction. Glycolate provision by  
472 the plant may therefore explain the increase in malate synthase expression in the  
473 absence of isocitrate lyase activity.

474 The model also contained uptake of xylose, which was metabolized in the pentose  
475 phosphate pathway and supported synthesis of nucleotides. Dicarboxylate  
476 catabolism generally requires gluconeogenesis to provide precursors for the  
477 synthesis of nucleotides and some amino acids. Due to the predicted xylose uptake,  
478 only minor flux through the reactions involved in gluconeogenesis was predicted,  
479 highlighting the importance of this pathway in bacteroids as an interesting question  
480 to explore using targeted mutant studies. Proton uptake by bacteroids was further  
481 required as previously predicted for *S. meliloti* bacteroids (27) and a demand  
482 reaction for PHB was retained in the model. PHB synthesis was highly variable  
483 across flux samples, which is in agreement with its previously suggested role for  
484 carbon and redox balancing (23, 40).

485 Low levels of uptake were predicted for most amino acids to support the required  
486 synthesis of protein, but no significant catabolism of any amino acid was observed.

487 Mutant studies have shown a requirement for branched-chain amino acid supply to  
488 bacteroids (52), and isoleucine was predicted to be supplied by the plant.

489 Interestingly, histidine was predicted to be synthesized rather than taken up by  
490 bacteroids. Several proteins involved in histidine synthesis were upregulated or  
491 unchanged in abundance in the bacteroid proteome compared to free-living Rlv3841  
492 (23), in contrast to the general downregulation of amino acid biosynthesis (3). Similar

493 results were obtained in a proteome study of *Rhizobium etli* (24) and RNA-Seq data  
494 for bacteroids of *R. leguminosarum* bv. *viciae* A34 and *R. leguminosarum* bv.  
495 *phaseoli* 4292 (76). In addition, mutants of *R. leguminosarum* bv. *trifolii* lacking  
496 histidinol dehydrogenase activity formed ineffective nodules on clover (77). To  
497 investigate the requirement for histidine biosynthesis, we compared the amino acid  
498 composition of the Nif and Fix proteins, which are highly expressed in bacteroids,  
499 with the overall amino acid composition of the Rlv3841 proteome (Table S7). We  
500 found a significant ( $P=0.042$ ) enrichment of histidine in the Nif and Fix proteins,  
501 which could at least partly explain why histidine biosynthesis is required in  
502 bacteroids.

503

## 504 **Discussion**

505 In this study, we present the first curated GSM for Rlv3841, a model strain for  
506 investigating rhizobium-legume interactions and a natural symbiont of the  
507 agriculturally important crop pea. GSMs have emerged as promising tools for  
508 informing experimental design, addressing fundamental research questions, and  
509 contextualizing experimental data (78). In order to obtain a high-quality model,  
510 integration of experimental data during model curation and validation is essential  
511 (79). We therefore evaluated our model using carbon source utilization, gene  
512 essentiality data and flux data obtained by  $^{13}\text{C}$  labelling and observed high  
513 agreement between model predictions and experimental data.  
514 We further used the GSM to elucidate metabolic changes in Rlv3841 as it transitions  
515 from a free-living soil bacterium in the rhizosphere to an undifferentiated nodule  
516 bacterium and finally to a nitrogen-fixing bacteroid. While significant advances in

517 determining metabolic requirements for successful symbiosis formation have been  
518 made using transcriptome data (10) and gene essentiality screens (13), genome-  
519 scale datasets are often difficult to interpret without the framework of a  
520 comprehensive model, especially when information about nutrient uptake is missing.  
521 To this end, we employed approaches integrating gene expression and metabolome  
522 data as well as gene essentiality predicted by INSeq to obtain condition-specific  
523 models. This allowed us to contextualize our model based on experimental data  
524 without assuming uptake rates for any nutrient. In addition, during the process of  
525 data integration, different fractions of the optimum objective value were tested as  
526 constraints to find a solution with the highest correlation between gene expression  
527 and associated reaction fluxes. Especially for nodule bacteria and bacteroids, using  
528 sub-optimal fluxes through the objective function as constraints during model  
529 contextualization was found to produce better agreement with experimental data.  
530 Objective functions can be difficult to define outside of defined growth in a laboratory  
531 culture, and our results highlight the need to adopt strategies beyond maximization  
532 of a biomass objective function to accurately capture metabolic behavior in complex  
533 environmental settings. A clear limitation of our approach is the imperfect correlation  
534 of gene expression and protein abundance, as well as protein abundance and  
535 enzyme activity (80, 81). Catabolic pathways common to multiple different  
536 compounds can further make it difficult to specifically determine which nutrient is  
537 taken up. Nevertheless, our model predictions are in good agreement with known  
538 metabolic characteristics of the different lifestyles of Rlv3841, attesting to the  
539 biological relevance of our findings.



540 The rhizosphere model showed substantial uptake of glycolate, aspartate and  
541 glutamine as well as mono- and oligosaccharides. These predictions are consistent  
542 with previous studies about gene expression (10) as well as nutrient uptake of a  
543 *Rhizobium* sp. from root exudates of *Arabidopsis* (44). We further identified a  
544 requirement for leucine synthesis in the rhizosphere, as well as a potentially  
545 important role for polyphosphate synthesis. However, the predicted nutrient uptake  
546 was not supported by gene essentiality predictions in all cases. While both INSeq  
547 gene essentiality assignments and our metabolic model generate predictions that  
548 warrant detailed investigation using isolated mutant strains, there are other possible  
549 explanations for this observation. First, root exudates might not contain sufficient  
550 quantities of a compound to complement an auxotrophy. In addition, the composition  
551 of plant root exudates has been shown to change over time (47), and compounds  
552 present at the time of RNA extraction may not be present from the time of  
553 inoculation, causing the loss of some mutants. Finally, for genes that are essential  
554 on complex media, the corresponding mutants may already be lost from or  
555 underrepresented in the bacterial population that is inoculated onto plants.

556 The model for nodule bacteria confirmed previous results suggesting supply of  
557 nutrients other than dicarboxylates, in particular sucrose-derived sugars, during the  
558 differentiation process (27). Interestingly, we found that *myo*-inositol catabolism was  
559 only predicted for nodule bacteria, but not in the rhizosphere or in bacteroids. While  
560 the importance of *myo*-inositol catabolism for competitiveness has been established  
561 (58), our results suggest that it may be particularly important for differentiating  
562 bacteria rather than those in the rhizosphere. For bacteroids, biosynthesis of  
563 histidine was found to be important in contrast to the general uptake predicted for

564 most other amino acids. In addition, low levels of xylose uptake were predicted to  
565 support nucleotide synthesis in bacteroids. This result indicates that a carbon source  
566 metabolized in the pentose phosphate pathway may be provided to bacteroids,  
567 which presents an interesting area to explore experimentally using mutants affected  
568 in gluconeogenesis. Initial predictions of isocitrate lyase activity, which disagree with  
569 measured enzyme activities in bacteroids, led us to hypothesize that glycolate is  
570 provided to bacteroids. This is supported by metabolomics data and could explain  
571 the induction of malate synthase in bacteroids without concomitant expression of  
572 isocitrate lyase.

573 In summary, our results provide insights into rhizobial metabolism in the rhizosphere,  
574 which can inform the design of more competitive rhizobial inocula as well as plants  
575 that secrete metabolites to specifically enrich beneficial bacterial strains. Our  
576 understanding of the nutrient exchanges between plants and rhizobia at different  
577 developmental stages inside nodules remains incomplete (3, 82), and the predictions  
578 presented herein provide a foundation for targeted investigation of amino acid and  
579 central carbon metabolism in particular. We anticipate that the highly curated  
580 metabolic model for Rlv3841 presented in this paper will provide a valuable resource  
581 for the reconstruction of GSMs for related species.

## 582 **Materials and Methods**

### 583 **Model reconstruction**

584 To reconstruct a GSM for Rlv3841, we combined information from multiple  
585 databases, which has been shown to significantly improve the scope of metabolic  
586 network reconstructions (83). All reconstructions were performed based on RefSeq  
587 assembly GCF\_000009265.1. We used the RAVEN Toolbox 2.0 (84) to create draft  
588 models from KEGG (28) and MetaCyc (29) using the functions  
589 `getKEGGModelForOrganism` and `getMetaCycModelForOrganism`,  
590 respectively. In addition, template-based reconstruction based on BLAST  
591 bidirectional hits was performed using a curated GSM for *S. meliloti* 1021 (iGD1348  
592 (27)) as a template for the function `getModelFromHomology`. All models were  
593 merged into one reaction list and reaction and compound identifiers were unified  
594 based on the reaction database provided by the ModelSEED (85), followed by  
595 removal of duplicate reactions. Starting from this database of reactions compiled  
596 from different sources, the reconstruction was curated. First, reactions without gene  
597 association were removed. Reactions involving non-specific compounds such as  
598 “acceptor” or “protein” were also deleted, as well as reactions involved in the  
599 biosynthesis and catabolism of secondary metabolites and non-metabolic processes,  
600 such as DNA and RNA modification because those were outside of the scope of our  
601 model. Extensive curation was then performed by evaluating metabolic pathways  
602 guided by the literature and the KEGG database. Pathways for catabolism of small  
603 carbon sources in particular were reconstructed based on predictions obtained from  
604 GapMind (86). Gene-protein-reaction associations were curated based on published

605 gene essentiality data for growth in minimal (30) and complete (13) media as well as  
606 enzyme commission (EC) number predictions obtained from DeepEC (31).  
607 Transport reactions were annotated based on literature evidence, in particular  
608 homology to experimentally characterized transporters in *S. meliloti* (87) and the  
609 annotation obtained from TransportDB 2.0 (88). We manually reconstructed  
610 pathways for organism-specific biomass components, such as lipopolysaccharides  
611 and exopolysaccharides, as well as pathways which were not present in any of the  
612 databases used for reconstruction, such as carnitine metabolism. To improve  
613 information on reaction directionality, upper and lower bounds were adjusted  
614 according to the information in a highly curated model for *E. coli* (iML1515 (32)) and  
615 the CarveMe template model for Gram-negative bacteria (33).  
616 The biomass objective function was defined as follows: The composition of DNA was  
617 determined from the RefSeq genome sequence. Similarly, RNA and protein  
618 composition were determined by counting nucleotides or amino acids in the  
619 annotated RNAs and protein coding sequences, respectively. Since the lipid  
620 composition of Rlv3841 has not been investigated so far, we adopted the values  
621 reported *R. leguminosarum* bv. *trifolii* ANU843 (89). *R. leguminosarum* produces  
622 predominantly C18 fatty acids, as well as smaller quantities of C16 fatty acids (40,  
623 90), and representative phospholipids in our model included fatty acids with these  
624 chain lengths. Lipopolysaccharides and exopolysaccharides were included with the  
625 fractions previously reported for *S. meliloti* (91). Cyclic beta-glucans have so far not  
626 been considered in metabolic models for rhizobia, however they can make up a  
627 significant fraction of the cellular dry weight (92) and were therefore also included as  
628 a biomass component. Apart from the main cell components, trace amounts of

629 cofactors identified as universally essential in prokaryotes (93) were included in the  
630 biomass objective function. Phytoene was also added to the biomass reaction due to  
631 the essentiality of the genes associated with its biosynthetic pathway. Carbon  
632 polymers such as glycogen, PHB and fatty acids, as well as polyamines such as  
633 homospermidine and putrescine are known to be produced by Rlv3841, however,  
634 the quantities in which they are produced vary depending on nutrient availability.  
635 Similar to our previous work (23), we therefore added demand reactions for these  
636 compounds to allow for variable accumulation. Glycogen and PHB were also  
637 included in the biomass objective function as they are commonly synthesized by  
638 free-living *R. leguminosarum* (94). A complete description of the biomass  
639 composition used in this study is given in Table S1.

640

#### 641 **General modelling procedures**

642 Standard metabolic modelling computations were performed in MATLAB R2020b  
643 (Mathworks) using scripts from the COBRA Toolbox v3.0 (95) and the Gurobi 9.1.1  
644 solver ([www.gurobi.com](http://www.gurobi.com)). When using the `optimizeCbModel` function, the Taxicab  
645 norm was minimized to avoid loops in the calculated flux distributions. All scripts are  
646 available on Github (<https://github.com/CarolinSchulte/Rlv3481-lifestyles>).

647

#### 648 **Model validation**

649 To evaluate the agreement between model predictions and experimentally  
650 determined carbon source utilization, we limited our analysis to those compounds  
651 that were either present in the model or showed a positive growth phenotype in the  
652 phenotype microarray experiment. The lower bounds for the exchange reactions

653 were then adjusted according to the composition of universal minimal salts (UMS)  
654 media (30) with ammonium as a nitrogen source, and flux through the biomass  
655 reaction was evaluated for each carbon source individually added to the model.  
656 Accuracy, precision and recall for carbon source utilization and gene essentiality  
657 analysis were calculated according to the following equations:

658

$$659 \quad accuracy = \frac{TP + TN}{TP + TN + FP + FN}$$

$$660 \quad precision = \frac{TP}{TP + FP}$$

$$661 \quad recall = \frac{TP}{FP + FN}$$

662

663 TP: true positives FP: false positives

664 TN: true negatives FN: false negatives

665

666 Gene essentiality analysis was performed using the function  
667 `singleGeneDeletion` with the MOMA (minimization of metabolic adjustment)  
668 option in the COBRA Toolbox, while all components of UMS media with succinate  
669 and ammonia were available without constraints on their uptake rate. The predictions  
670 were compared with gene essentiality data for Rlv3841 determined by INSeq (13,  
671 30). Genes that were experimentally classified as essential or defective were  
672 considered essential in our analysis. The threshold for a gene to be considered  
673 essential *in silico* was set to 50% of the wild-type growth rate since all mutant strains  
674 are grown in a single culture for an INSeq experiment, and a slower growth rate will

675 therefore decrease the abundance of a mutant even if the gene carrying the insertion  
676 is not absolutely essential.

677 For comparison with  $^{13}\text{C}$  labelling data, boundary conditions were set to allow for  
678 unlimited uptake of UMS media components. The succinate uptake rate was  
679 constrained to 1 flux unit and flux balance analysis was performed maximizing the  
680 biomass objective function. In addition, loopless flux variability analysis was  
681 performed where the objective fraction was set to 95% of the optimum value.

682

### 683 **Data integration for model contextualization**

684 The Python implementation of RIPTiDe (<https://github.com/mjenior/riptide>) (41) was  
685 used to generate condition-specific models of iCS1224. Max fit RIPTiDe was run for  
686 objective flux fractions between 0.5 and 0.95 with 0.05 increments, and the context-  
687 specific models with the highest correlation between flux values and transcriptome  
688 data were used in further analyses.

689 In addition to the nutrient availability determined based on experimental data, trace  
690 elements and vitamins required for flux through the objective function were added to  
691 the *in silico* representation of each environment. If an exchange and transport  
692 reaction for a compound already existed in the model, the lower bound of the  
693 exchange reaction was set to -1000. If a compound was only present as an  
694 intracellular metabolite, a sink reaction for this metabolite with lower bound set to -  
695 1000 and upper bound set to 0 was added. This was done to avoid erroneous  
696 exclusion of metabolites which are present in the environment, but for which  
697 transporters have not been identified. Some cofactors and central intermediates of  
698 carbon metabolism, such as glyceraldehyde 3-phosphate, were excluded from

699 environmental representations since their uptake would result in unspecific  
700 predictions for metabolic pathway activity (Supplementary Text).

701

### 702 **Data integration for rhizosphere model**

703 For the rhizosphere model, compounds that have been detected in pea root  
704 exudates (10, 12, 48, 49) and that could be matched to model metabolites were  
705 specified with unlimited availability (Table S2 and S3). Flux through the biomass  
706 reaction as described in the previous section was set as the objective function and in  
707 addition, a lower bound of one flux unit was set for demand reactions for Nod factor,  
708 lipopolysaccharides and exopolysaccharides, since these compounds are known to  
709 be produced as part of the root colonization process (4). RPKM values for RNA-Seq  
710 data obtained from Rlv3841 in the pea rhizosphere 7 days post inoculation were  
711 provided as an input, and all genes that are present in the model and were classified  
712 as essential or defective in the rhizosphere (13) were specified as model tasks to  
713 prevent removal of the associated reactions during the pruning process.

714

### 715 **Data integration for nodule bacteria model**

716 For nodule bacteria, all metabolites that were detected by rhizobial biosensors in pea  
717 nodules (12) were allowed to be taken up without limitation, as well as all amino  
718 acids and metabolites whose abundance was at least ten-fold higher in the nodule  
719 cytosol compared to root exudates (Table S4 and S5). A lower bound of one flux unit  
720 was set for lipopolysaccharide and exopolysaccharide demand reactions and  
721 biomass production was used as the objective function. RPKM values for dRNA-Seq  
722 data obtained from the tip of pea nodules were provided as an input, and all genes



723 that were classified as essential or defective for nodule bacteria (13) were specified  
724 as model tasks to prevent removal of the associated reactions during the pruning  
725 process.

726

### 727 **Data integration for bacteroids**

728 Similar to the nodule bacteria model, metabolites detected in nodules by rhizobial  
729 biosensors, and all amino acids were made available to the bacteroid model (Table  
730 S6). However, fructose and sucrose were not included since they are known to be  
731 poorly oxidized by bacteroids (96). Inclusion of the metabolites increased in the  
732 nodule cytosol compared to root exudates led to a decrease in correlation of flux  
733 predictions and gene expression data, and those metabolites were therefore omitted  
734 from the nutrients available to bacteroids. A lower bound of one flux unit was set for  
735 the synthesis of fatty acids and proteins and flux through the nitrogenase reaction  
736 was used as the objective function. RPKM values for dRNA-Seq data obtained from  
737 the middle of pea nodules were provided as an input, and all genes associated with  
738 proteins significantly upregulated in bacteroids compared to free-living cells (23)  
739 were specified as model tasks to prevent removal of the associated reactions during  
740 the pruning process.

741

### 742 **Phenotype MicroArray™ analysis**

743 Carbon source utilization of Rlv3841 was assessed using the phenotype microarray  
744 technology (Biolog, Hayward, USA). A liquid culture of Rlv3841 was grown at 28 °C  
745 in UMS media supplemented with 10 mM glucose, 10 mM ammonium chloride and a  
746 vitamin solution as previously described (30). Cells were spun down and washed

747 three times in UMS without addition of a carbon or nitrogen source. The optical  
748 density at 600 nm was then adjusted to 0.1 with UMS supplemented with 10 mM  
749 ammonium chloride and vitamins, and 100 ml of cell suspension were added to each  
750 well of the phenotype microarray plate. After overnight incubation without shaking at  
751 28 °C, 10 ml of a 0.1 % (w/v) stock solution of 2,3,5-triphenyltetrazolium chloride in  
752 water were added to each well. Plates were then incubated in an Omega FluoStar  
753 plate reader with double orbital shaking at 500 rpm and the absorbance at 505 nm  
754 was measured every 15 min. Absorbance values were analyzed using the DuctApe  
755 software (97), and all carbon sources with an activity value higher than the water  
756 control were considered to support growth. For activity values close to the growth  
757 threshold, curves were manually inspected, and literature searches were performed  
758 to determine if the carbon source supports growth of *R. leguminosarum*. The full  
759 DuctApe output for the phenotype microarray analysis is available in Supplementary  
760 Data 4.

761

## 762 **Metabolomics data**

763 Metabolomics data were obtained in a previous study (40), where only values for  
764 metabolites relevant to the investigated metabolic pathways were published . The full  
765 metabolomics dataset is included as Supplementary Data 7.

766

## 767 **Sample preparation for RNA-Seq of rhizosphere bacteria**

768 For total RNA extraction from Rlv3841 in the pea rhizosphere, *Pisum sativum* cv.  
769 Avola seeds were surface sterilized and sown in sterilized boiling tubes with fine  
770 vermiculite and nitrogen-free rooting solution. Pea seeds were grown in the dark for

771 3 days and then transferred to a controlled environment room, where they were  
772 grown at 25 °C with a 16:8 h photoperiod for another 4 days. On day 7, 1 ml (108  
773 CFU/ml) of washed Rlv3841 cells was added near the root. At 7 days post  
774 inoculation, rhizobial cells were harvested from the rhizosphere as previously  
775 described (10). RNA was extracted for three biological replicates where the total  
776 RNA extracted from the pea rhizosphere of 16 boiling tubes was pooled for each  
777 replicate. Quality and quantity of the total RNA was assessed using Experion  
778 StdSens (Standard Sensitivity) and HighSens (High Sensitivity) analysis kits. Total  
779 RNA (3 mg per sample) was treated with the TURBO DNA-free kit (Invitrogen  
780 AM1907) as previously described (10). Depletion of genomic DNA was confirmed by  
781 performing a Qubit fluorometer double-stranded DNA broad range assay. Finally, the  
782 ribosomal RNA was depleted from the RNA sample using the Illumina Ribo-Zero  
783 rRNA removal kit - Gram-negative (MRZGN126) according to the manufacturer's  
784 instructions. The rRNA-depleted mRNA was purified using the ZymoResearch RNA  
785 Clean & Concentrator 50. mRNA samples were used to generate barcoded cDNA  
786 libraries for multiplexing during sequencing using the Ion Total RNA-Seq kit v2  
787 (Thermo Fisher Scientific). Each barcoded cDNA library was quantified using the  
788 Agilent Bioanalyzer High Sensitivity DNA kit and diluted to a final concentration of 70  
789 pM. Equal volumes of the diluted cDNA libraries were pooled before loading on the  
790 IonChef for template preparation and chip loading. Finally, the chips were sequenced  
791 in an Ion Proton Semiconductor based sequencing platform (Thermo Fisher  
792 Scientific). The full dataset is available on the NCBI SRA database, BioProject  
793 number PRJNA748006.  
794

795 **Data analysis for RNA-Seq of rhizosphere bacteria**

796 RNA-Seq data was de-multiplexed based on valid barcodes and data for each library  
797 was downloaded in fastq format. The overall quality of the sequencing and the data  
798 was assessed based on the Torrent Browser suite sequencing run report summary.  
799 Data from each library was assessed using FastQC (Babraham Institute;  
800 <https://www.bioinformatics.babraham.ac.uk/projects/fastqc/>) and any remaining  
801 adapters and low-quality reads were filtered using cutadapt (98). The data for each  
802 library was mapped against the Rlv3841 genome using EDGE-pro (99) developed  
803 specifically for bacterial RNA-Seq data. EDGE-pro uses Bowtie2 to map the reads to  
804 the genome and calculates the frequencies per nucleotide. EDGE-pro calculates the  
805 number of reads and RPKM value for each gene feature in the genome including  
806 mRNA, rRNA, tRNA. The mapped reads from each library were visualized with the  
807 Integrative Genomics Viewer (100) for further analysis.

808

809 **dRNA-Seq data for nodule bacteria and bacteroids**

810 The dRNA-Seq data used for creation of the nodule bacteria and the bacteroid  
811 model were described previously (65) and are available on the NCBI SRA database,  
812 BioProject number PRJNA667846.

813 **References**

814

- 815 1. Ågren GI, Wetterstedt JÅM, Billberger MFK. 2012. Nutrient limitation on  
816 terrestrial plant growth – modeling the interaction between nitrogen and  
817 phosphorus. *New Phytol* 194:953–960.
- 818 2. Udvardi M, Poole PS. 2013. Transport and metabolism in legume-rhizobia  
819 symbioses. *Annu Rev Plant Biol* 64:781–805.
- 820 3. Ledermann R, Schulte CCM, Poole PS. 2021. How rhizobia adapt to the  
821 nodule environment. *J Bacteriol* 203:e00539-20.
- 822 4. Poole P, Ramachandran V, Terpolilli J. 2018. Rhizobia: from saprophytes to  
823 endosymbionts. *Nat Rev Microbiol* 16:291–303.
- 824 5. Young JPW, Crossman LC, Johnston AWB, Thomson NR, Ghazoui ZF, Hull  
825 KH, Wexler M, Curson ARJ, Todd JD, Poole PS, Mauchline TH, East AK,  
826 Quail MA, Churcher C, Arrowsmith C, Cherevach I, Chillingworth T, Clarke K,  
827 Cronin A, Davis P, Fraser A, Hance Z, Hauser H, Jagels K, Moule S, Mungall  
828 K, Norbertczak H, Rabinowitsch E, Sanders M, Simmonds M, Whitehead S,  
829 Parkhill J. 2006. The genome of *Rhizobium leguminosarum* has recognizable  
830 core and accessory components. *Genome Biol* 7:R34.
- 831 6. Galibert F, Finan TM, Long SR, Puhler A, Abola P, Ampe F, Barloy-Hubler F,  
832 Barnett MJ, Becker A, Boistard P, Bothe G, Boutry M, Bowser L, Buhrmester J,  
833 Cadieu E, Capela D, Chain P, Cowie A, Davis RW, Dreano S, Federspiel NA,  
834 Fisher RF, Gloux S, Godrie T, Goffeau A, Golding B, Gouzy J, Gurjal M,  
835 Hernandez-Lucas I, Hong A, Huizar L, Hyman RW, Jones T, Kahn D, Kahn  
836 ML, Kalman S, Keating DH, Kiss E, Komp C, Lelaure V, Masuy D, Palm C,  
837 Peck MC, Pohl TM, Portetelle D, Purnelle B, Ramsperger U, Surzycki R,

- 838 Thebault P, Vandenbol M, Vorholter FJ, Weidner S, Wells DH, Wong K, Yeh  
839 KC, Batut J. 2001. The composite genome of the legume symbiont  
840 *Sinorhizobium meliloti*. *Science* 293:668–672.
- 841 7. González V, Santamaría RI, Bustos P, Hernández-González I, Medrano-Soto  
842 A, Moreno-Hagelsieb G, Janga SC, Ramírez MA, Jiménez-Jacinto V, Collado-  
843 Vides J, Dávila G. 2006. The partitioned *Rhizobium etli* genome: Genetic and  
844 metabolic redundancy in seven interacting replicons. *Proc Natl Acad Sci*  
845 103:3834–3839.
- 846 8. Jiao J, Ni M, Zhang B, Zhang Z, Young JPW, Chan T-F, Chen WX, Lam H-M,  
847 Tian CF. 2018. Coordinated regulation of core and accessory genes in the  
848 multipartite genome of *Sinorhizobium fredii*. *PLOS Genet* 14:e1007428.
- 849 9. DiCenzo GC, Checcucci A, Bazzicalupo M, Mengoni A, Viti C, Dziewit L, Finan  
850 TM, Galardini M, Fondi M. 2016. Metabolic modelling reveals the specialization  
851 of secondary replicons for niche adaptation in *Sinorhizobium meliloti*. *Nat*  
852 *Commun* 7:1–10.
- 853 10. Ramachandran VK, East AK, Karunakaran R, Downie JA, Poole PS. 2011.  
854 Adaptation of *Rhizobium leguminosarum* to pea, alfalfa and sugar beet  
855 rhizospheres investigated by comparative transcriptomics. *Genome Biol*  
856 12:R106.
- 857 11. Fagorzi C, Bacci G, Huang R, Cangilioli L, Checcucci A, Fini M, Perrin E, Natali  
858 C, diCenzo GC, Mengoni A. 2021. Nonadditive transcriptomic signatures of  
859 genotype-by-genotype interactions during the initiation of plant-rhizobium  
860 symbiosis. *mSystems* 6:e00974-20.
- 861 12. Pini F, East AK, Appia-Ayme C, Tomek J, Karunakaran R, Mendoza-Suárez

- 862 M, Edwards A, Terpolilli JJ, Roworth J, Downie JA, Poole PS. 2017. Bacterial  
863 biosensors for *in vivo* spatiotemporal mapping of root secretion. *Plant Physiol*  
864 174:1289–1306.
- 865 13. Wheatley RM, Ford BL, Li L, Aroney STN, Knights HE, Ledermann R, East AK,  
866 Ramachandran VK, Poole PS. 2020. Lifestyle adaptations of *Rhizobium* from  
867 rhizosphere to symbiosis. *Proc Natl Acad Sci* 117:23823–23834.
- 868 14. Checcucci A, DiCenzo GC, Bazzicalupo M, Mengoni A. 2017. Trade,  
869 diplomacy, and warfare: the quest for elite rhizobia inoculant strains. *Front*  
870 *Microbiol* 8:2207.
- 871 15. Mendoza-Suárez MA, Geddes BA, Sánchez-Cañizares C, Ramírez-González  
872 RH, Kirchhelle C, Jorriin B, Poole PS. 2020. Optimizing *Rhizobium*-legume  
873 symbioses by simultaneous measurement of rhizobial competitiveness and N<sub>2</sub>  
874 fixation in nodules. *Proc Natl Acad Sci* 117:9822–9831.
- 875 16. Busby PE, Soman C, Wagner MR, Friesen ML, Kremer J, Bennett A, Morsy M,  
876 Eisen JA, Leach JE, Dangl JL. 2017. Research priorities for harnessing plant  
877 microbiomes in sustainable agriculture. *PLOS Biol* 15:e2001793.
- 878 17. DiCenzo GC, Zamani M, Checcucci A, Fondi M, Griffitts JS, Finan TM,  
879 Mengoni A. 2019. Multidisciplinary approaches for studying rhizobium–legume  
880 symbioses. *Can J Microbiol* 65:1-33.
- 881 18. Nielsen J. 2017. Systems biology of metabolism. *Annu Rev Biochem* 86:245–  
882 275.
- 883 19. Thiele I, Palsson B. 2010. A protocol for generating a high-quality genome-  
884 scale metabolic reconstruction. *Nat Protoc* 5:93–121.
- 885 20. Orth JD, Thiele I, Palsson BO. 2010. What is flux balance analysis? *Nat*

- 886 Biotechnol 28:245-248.
- 887 21. Blazier AS, Papin JA. 2012. Integration of expression data in genome-scale  
888 metabolic network reconstructions. *Front Physiol* 3:299.
- 889 22. Contador CA, Lo S-K, Chan SHJ, Lam H-M. 2020. Metabolic analyses of  
890 nitrogen fixation in the soybean microsymbiont *Sinorhizobium fredii* using  
891 constraint-based modeling. *mSystems* 5:e00516-19.
- 892 23. Schulte CCM, Borah K, Wheatley RM, Terpolilli JJ, Saalbach G, Crang N, de  
893 Groot DH, Ratcliffe RG, Kruger NJ, Papachristodoulou A, Poole PS. 2021.  
894 Metabolic constraints on nitrogen fixation by rhizobia in legume nodules.  
895 bioRxiv <https://doi.org/10.1101/2021.02.16.431433>.
- 896 24. Resendis-Antonio O, Hernández M, Salazar E, Contreras S, Batallar GM,  
897 Mora Y, Encarnación S. 2011. Systems biology of bacterial nitrogen fixation:  
898 high-throughput technology and its integrative description with constraint-  
899 based modeling. *BMC Syst Biol* 5:120.
- 900 25. Zhao H, Li M, Fang K, Chen W, Wang J. 2012. *In silico* insights into the  
901 symbiotic nitrogen fixation in *Sinorhizobium meliloti* via metabolic  
902 reconstruction. *PLoS One* 7:e31287.
- 903 26. Yang Y, Hu X-P, Ma B-G. 2017. Construction and simulation of the  
904 *Bradyrhizobium diazoefficiens* USDA110 metabolic network: a comparison  
905 between free-living and symbiotic states. *Mol BioSyst* 13:607.
- 906 27. diCenzo GC, Tesi M, Pfau T, Mengoni A, Fondi M. 2020. Genome-scale  
907 metabolic reconstruction of the symbiosis between a leguminous plant and a  
908 nitrogen-fixing bacterium. *Nat Commun* 11:1–11.
- 909 28. Kanehisa M, Furumichi M, Tanabe M, Sato Y, Morishima K. 2016. KEGG: new



- 910 perspectives on genomes, pathways, diseases and drugs. *Nucleic Acids Res*  
911 45:353–361.
- 912 29. Caspi R, Billington R, Keseler IM, Kothari A, Krummenacker M, Midford PE,  
913 Ong WK, Paley S, Subhraveti P, Karp PD. 2020. The MetaCyc database of  
914 metabolic pathways and enzymes - a 2019 update. *Nucleic Acids Res*  
915 48:D445–D453.
- 916 30. Wheatley RM, Ramachandran VK, Geddes BA, Perry BJ, Yost CK, Poole PS.  
917 2017. Role of O<sub>2</sub> in the growth of *Rhizobium leguminosarum* bv. *viciae* 3841  
918 on glucose and succinate. *J Bacteriol* 199:e00572-16.
- 919 31. Ryu JY, Kim HU, Lee SY. 2019. Deep learning enables high-quality and high-  
920 throughput prediction of enzyme commission numbers. *Proc Natl Acad Sci*  
921 116:13996–14001.
- 922 32. Monk JM, Lloyd CJ, Brunk E, Mih N, Sastry A, King Z, Takeuchi R, Nomura W,  
923 Zhang Z, Mori H, Feist AM, Palsson BO. 2017. iML1515, a knowledgebase  
924 that computes *Escherichia coli* traits. *Nat Biotechnol* 35:904–908.
- 925 33. Machado D, Andrejev S, Tramontano M, Patil KR. 2018. Fast automated  
926 reconstruction of genome-scale metabolic models for microbial species and  
927 communities. *Nucleic Acids Res* 46:7542-7553.
- 928 34. Galperin MY, Wolf YI, Makarova KS, Vera Alvarez R, Landsman D, Koonin E  
929 V. 2021. COG database update: focus on microbial diversity, model  
930 organisms, and widespread pathogens. *Nucleic Acids Res* 49:D274–D281.
- 931 35. Lieven C, Beber ME, Olivier BG, Bergmann FT, Ataman M, Babaei P, Bartell  
932 JA, Blank LM, Chauhan S, Correia K, Diener C, Dräger A, Ebert BE,  
933 Edirisinghe JN, Faria JP, Feist AM, Fengos G, Fleming RMT, García-Jiménez

- 934 B, Hatzimanikatis V, van Helvoirt W, Henry CS, Hermjakob H, Herrgård MJ,  
935 Kaafarani A, Kim HU, King Z, Klamt S, Klipp E, Koehorst JJ, König M,  
936 Lakshmanan M, Lee DY, Lee SY, Lee S, Lewis NE, Liu F, Ma H, Machado D,  
937 Mahadevan R, Maia P, Mardinoglu A, Medlock GL, Monk JM, Nielsen J,  
938 Nielsen LK, Nogales J, Nookaew I, Palsson BO, Papin JA, Patil KR, Poolman  
939 M, Price ND, Resendis-Antonio O, Richelle A, Rocha I, Sánchez BJ, Schaap  
940 PJ, Malik Sheriff RS, Shoaie S, Sonnenschein N, Teusink B, Vilaça P, Vik JO,  
941 Wodke JAH, Xavier JC, Yuan Q, Zakhartsev M, Zhang C. 2020. MEMOTE for  
942 standardized genome-scale metabolic model testing. *Nat Biotechnol* 38:272–  
943 276.
- 944 36. Bochner BR, Gadzinski P, Panomitros E. 2001. Phenotype microarrays for  
945 high-throughput phenotypic testing and assay of gene function. *Genome Res*  
946 11:1246–1255.
- 947 37. Bartell JA, Blazier AS, Yen P, Thøgersen JC, Jelsbak L, Goldberg JB, Papin  
948 JA. 2017. Reconstruction of the metabolic network of *Pseudomonas*  
949 *aeruginosa* to interrogate virulence factor synthesis. *Nat Commun* 8:14631.
- 950 38. Monk JM, Charusanti P, Aziz RK, Lerman JA, Premyodhin N, Orth JD, Feist  
951 AM, Palsson BØ. 2013. Genome-scale metabolic reconstructions of multiple  
952 *Escherichia coli* strains highlight strain-specific adaptations to nutritional  
953 environments. *Proc Natl Acad Sci* 110:20338–20343.
- 954 39. Blazier AS, Papin JA. 2019. Reconciling high-throughput gene essentiality  
955 data with metabolic network reconstructions. *PLOS Comput Biol* 15:e1006507.
- 956 40. Terpolilli JJ, Masakapalli SK, Karunakaran R, Webb IUC, Green R, Watmough  
957 NJ, Kruger NJ, Ratcliffe RG, Poole PS. 2016. Lipogenesis and redox balance

- 958 in nitrogen-fixing pea bacteroids. *J Bacteriol* 198:2864–2875.
- 959 41. Jenior ML, Moutinho Jr. TJ, Dougherty B V, Papin JA. 2020. Transcriptome-  
960 guided parsimonious flux analysis improves predictions with metabolic  
961 networks in complex environments. *PLOS Comput Biol* 16:e1007099.
- 962 42. Rudrappa T, Czymmek KJ, Paré PW, Bais HP. 2008. Root-secreted malic acid  
963 recruits beneficial soil bacteria. *Plant Physiol* 148:1547–1556.
- 964 43. Biedrzycki ML, Bais HP. 2009. Root secretions: from genes and molecules to  
965 microbial associations. *J Exp Bot* 60:1533–1534.
- 966 44. Jacoby RP, Martyn A, Kopriva S. 2018. Exometabolomic profiling of bacterial  
967 strains as cultivated using *Arabidopsis* root extract as the sole carbon source.  
968 *Mol Plant Microbe Interact* 31:803–813.
- 969 45. Baran R, Brodie EL, Mayberry-Lewis J, Hummel E, Da Rocha UN,  
970 Chakraborty R, Bowen BP, Karaoz U, Cadillo-Quiroz H, Garcia-Pichel F,  
971 Northen TR. 2015. Exometabolite niche partitioning among sympatric soil  
972 bacteria. *Nat Commun* 6:8289.
- 973 46. Jacoby RP, Kopriva S. 2019. Metabolic niches in the rhizosphere microbiome:  
974 new tools and approaches to analyse metabolic mechanisms of plant-microbe  
975 nutrient exchange. *J Exp Bot* 70:1087–1094.
- 976 47. Zhalnina K, Louie KB, Hao Z, Mansoori N, da Rocha UN, Shi S, Cho H,  
977 Karaoz U, Loqué D, Bowen BP, Firestone MK, Northen TR, Brodie EL. 2018.  
978 Dynamic root exudate chemistry and microbial substrate preferences drive  
979 patterns in rhizosphere microbial community assembly. *Nat Microbiol* 3:470–  
980 480.
- 981 48. Gaworzewska ET, Carlile MJ. 1982. Positive chemotaxis of *Rhizobium*

- 982 *leguminosarum* and other bacteria towards root exudates from legumes and  
983 other plants. *Microbiology* 128:1179–1188.
- 984 49. Knee EM, Gong F-C, Gao M, Teplitski M, Jones AR, Foxworthy A, Mort AJ,  
985 Bauer WD. 2001. Root mucilage from pea and its utilization by rhizosphere  
986 bacteria as a sole carbon source. *Mol Plant-Microbe Interact* 14:775–784.
- 987 50. Annie L, Magne Ø, Karine M, Marie-Christine P, Daniel LR. 2001. Fructose  
988 uptake in *Sinorhizobium meliloti* is mediated by a high-affinity ATP-binding  
989 sasette transport system. *J Bacteriol* 183:4709–4717.
- 990 51. Ding H, Yip CB, Geddes BA, Oresnik IJ, Hynes MF. 2012. Glycerol utilization  
991 by *Rhizobium leguminosarum* requires an ABC transporter and affects  
992 competition for nodulation. *Microbiology* 158:1369–1378.
- 993 52. Prell J, White JP, Bourdes A, Bunnewell S, Bongaerts RJ, Poole PS. 2009.  
994 Legumes regulate *Rhizobium* bacteroid development and persistence by the  
995 supply of branched-chain amino acids. *Proc Natl Acad Sci* 106:12477–12482.
- 996 53. Sanjuán-Pinilla JM, Muñoz S, Nogales J, Olivares J, Sanjuán J. 2002.  
997 Involvement of the *Sinorhizobium meliloti leuA* gene in activation of nodulation  
998 genes by NodD1 and luteolin. *Arch Microbiol* 178:36–44.
- 999 54. Cole BJ, Feltcher ME, Waters RJ, Wetmore KM, Mucyn TS, Ryan EM, Wang  
1000 G, Ul-Hasan S, McDonald M, Yoshikuni Y, Malmstrom RR, Deutschbauer AM,  
1001 Dangl JL, Visel A. 2017. Genome-wide identification of bacterial plant  
1002 colonization genes. *PLOS Biol* 15:e2002860.
- 1003 55. Becerra-Rivera VA, Dunn MF. 2019. Polyamine biosynthesis and biological  
1004 roles in rhizobia. *FEMS Microbiol Lett* 366:fnz084.
- 1005 56. Cheng G, Karunakaran R, East AK, Munoz-Azcarate O, Poole PS. 2017.

- 1006            Glutathione affects the transport activity of *Rhizobium leguminosarum* 3841  
1007            and is essential for efficient nodulation. FEMS Microbiol Lett 364:fnx045.
- 1008    57.    Webb I, Xu J, Sanchez-Cañizares C, Karunakaran R, Ramachandran V,  
1009            Rutten P, East A, Huang W, Watmough N, Poole P. 2021. Regulation and  
1010            characterization of mutants of *fixABCX* in *Rhizobium leguminosarum*. Mol  
1011            Plant-Microbe Interact <https://doi.org/10.1094/MPMI-02-21-0037-R>.
- 1012    58.    Fry J, Wood M, Poole PS. 2001. Investigation of *myo*-inositol catabolism in  
1013            *Rhizobium leguminosarum* bv. *viciae* and its effect on nodulation  
1014            competitiveness. Mol Plant-Microbe Interact 14:1016–1025.
- 1015    59.    Yost CK, Rath AM, Noel TC, Hynes MF. 2006. Characterization of genes  
1016            involved in erythritol catabolism in *Rhizobium leguminosarum* bv. *viciae*.  
1017            Microbiology 152:2061–2074.
- 1018    60.    Barbier T, Collard F, Zúñiga-Ripa A, Moriyón I, Godard T, Becker J, Wittmann  
1019            C, Van Schaftingen E, Letesson JJ. 2014. Erythritol feeds the pentose  
1020            phosphate pathway via three new isomerases leading to D-erythrose-4-  
1021            phosphate in *Brucella*. Proc Natl Acad Sci 111:17815–17820.
- 1022    61.    Patil KR, Nielsen J. 2005. Uncovering transcriptional regulation of metabolism  
1023            by using metabolic network topology. Proc Natl Acad Sci 102:2685–2689.
- 1024    62.    Newman JD, Diebold RJ, Schultz BW, Noel KD. 1994. Infection of soybean  
1025            and pea nodules by *Rhizobium* spp. purine auxotrophs in the presence of 5-  
1026            aminoimidazole-4-carboxamide riboside. J Bacteriol 176:3286–3294.
- 1027    63.    Ofaim S, Sulheim S, Almaas E, Sher D, Segrè D. 2021. Dynamic allocation of  
1028            carbon storage and nutrient-dependent exudation in a revised genome-scale  
1029            model of *Prochlorococcus*. Front Genet 12:586293.

- 1030 64. Vasse J, F de B, Camut S, Truchet G. 1990. Correlation between  
1031 ultrastructural differentiation of bacteroids and nitrogen fixation in alfalfa  
1032 nodules. *J Bacteriol* 172:4295–4306.
- 1033 65. Rutten PJ, Steel H, Hood GA, Ramachandran VK, McMurtry L, Geddes B,  
1034 Papachristodoulou A, Poole PS. 2021. Multiple sensors provide spatiotemporal  
1035 oxygen regulation of gene expression in a *Rhizobium*-legume symbiosis.  
1036 *PLOS Genet* 17:e1009099.
- 1037 66. Fournier J, Timmers ACJ, Sieberer BJ, Jauneau A, Chabaud M, Barker DG.  
1038 2008. Mechanism of infection thread elongation in root hairs of *Medicago*  
1039 *truncatula* and dynamic interplay with associated rhizobial colonization. *Plant*  
1040 *Physiol* 148:1985–1995.
- 1041 67. Ronson CW, Lyttleton P, Robertson JG. 1981. C(4)-dicarboxylate transport  
1042 mutants of *Rhizobium trifolii* form ineffective nodules on *Trifolium repens*. *Proc*  
1043 *Natl Acad Sci* 78:4284–8.
- 1044 68. Prell J, Bourdés A, Karunakaran R, Lopez-Gomez M, Poole P. 2009. Pathway  
1045 of  $\gamma$ -aminobutyrate metabolism in *Rhizobium leguminosarum* 3841 and its role  
1046 in symbiosis. *J Bacteriol* 191:2177–2186.
- 1047 69. Poole PS, Blyth A, Reid CJ, Walters K. 1994. *Myo*-inositol catabolism and  
1048 catabolite regulation in *Rhizobium leguminosarum* bv. *viciae*. *Microbiology*  
1049 140:2787–2795.
- 1050 70. Oono R, Denison RF, Kiers ET. 2009. Controlling the reproductive fate of  
1051 rhizobia: how universal are legume sanctions? *New Phytol* 183:967–979.
- 1052 71. Mulley G, White JP, Karunakaran R, Prell J, Bourdes A, Bunnewell S, Hill L,  
1053 Poole PS. 2011. Mutation of GOGAT prevents pea bacteroid formation and N<sub>2</sub>

- 1054 fixation by globally downregulating transport of organic nitrogen sources. *Mol*  
1055 *Microbiol* 80:149–167.
- 1056 72. Karunakaran R, Ramachandran VK, Seaman JC, East AK, Mouhsine B,  
1057 Mauchline TH, Prell J, Skeffington A, Poole PS. 2009. Transcriptomic analysis  
1058 of *Rhizobium leguminosarum* biovar *viciae* in symbiosis with host plants *Pisum*  
1059 *sativum* and *Vicia cracca*. *J Bacteriol* 191:4002–14.
- 1060 73. Finan TM, Wood JM, Jordan DC. 1983. Symbiotic properties of C4-  
1061 dicarboxylic acid transport mutants of *Rhizobium leguminosarum*. *J Bacteriol*  
1062 154:1403–1413.
- 1063 74. Mitsch MJ, DiCenzo GC, Cowie A, Finan TM. 2018. Succinate transport is not  
1064 essential for symbiotic nitrogen fixation by *Sinorhizobium meliloti* or *Rhizobium*  
1065 *leguminosarum*. *Appl Environ Microbiol* 84:e01561-17.
- 1066 75. Johnson G V, Evans HJ, Ching T. 1966. Enzymes of the glyoxylate cycle in  
1067 rhizobia and nodules of legumes. *Plant Physiol* 41:1330–1336.
- 1068 76. Green RT, East AK, Karunakaran R, Downie JA, Poole PS. 2019.  
1069 Transcriptomic analysis of *Rhizobium leguminosarum* bacteroids in  
1070 determinate and indeterminate nodules. *Microb Genomics* 5:e000254.
- 1071 77. Yadav, Vashishat, Kuykendall, Hashem. 1998. Biochemical and symbiotic  
1072 properties of histidine-requiring mutants of *Rhizobium leguminosarum* biovar  
1073 *trifolii*. *Lett Appl Microbiol* 26:22–26.
- 1074 78. Gu C, Kim GB, Kim WJ, Kim HU, Lee SY. 2019. Current status and  
1075 applications of genome-scale metabolic models. *Genome Biol* 20:121.
- 1076 79. Kim WJ, Kim HU, Lee SY. 2017. Current state and applications of microbial  
1077 genome-scale metabolic models. *Curr Opin Syst Biol* 2:10-18.

- 1078 80. Machado D, Herrgård M. 2014. Systematic evaluation of methods for  
1079 integration of transcriptomic data into constraint-based models of metabolism.  
1080 PLoS Comput Biol 10:e1003580.
- 1081 81. Liu Y, Beyer A, Aebersold R. 2016. On the dependency of cellular protein  
1082 levels on mRNA Abundance. Cell 165:535–550.
- 1083 82. Dunn MF. 2015. Key roles of microsymbiont amino acid metabolism in  
1084 rhizobia-legume interactions. Crit Rev Microbiol 41:411–451.
- 1085 83. Griesemer M, Kimbrel JA, Zhou CE, Navid A. 2018. Combining multiple  
1086 functional annotation tools increases coverage of metabolic annotation. BMC  
1087 Genomics 19:948.
- 1088 84. Wang H, Marcišauskas S, Sánchez BJ, Domenzain I, Hermansson D, Agren  
1089 R, Nielsen J, Kerkhoven EJ. 2018. RAVEN 2.0: A versatile toolbox for  
1090 metabolic network reconstruction and a case study on *Streptomyces*  
1091 *coelicolor*. PLOS Comput Biol 14:e1006541.
- 1092 85. Henry CS, Dejongh M, Best AA, Frybarger PM, Linsay B, Stevens RL. 2010.  
1093 High-throughput generation, optimization and analysis of genome-scale  
1094 metabolic models. Nat Biotechnol 28:977–982.
- 1095 86. Price MN, Deutschbauer AM, Arkin AP. 2020. GapMind: Automated annotation  
1096 of amino acid biosynthesis. mSystems 5:e00291-20.
- 1097 87. Mauchline TH, Fowler JE, East AK, Sartor AL, Zaheer R, Hosie AHF, Poole  
1098 PS, Finan TM. 2006. Mapping the *Sinorhizobium meliloti* 1021 solute-binding  
1099 protein-dependent transportome. Proc Natl Acad Sci 103:17933-17938.
- 1100 88. Elbourne LDH, Tetu SG, Hassan KA, Paulsen IT. 2017. TransportDB 2.0: a  
1101 database for exploring membrane transporters in sequenced genomes from all



- 1102 domains of life. *Nucleic Acids Res* 45:D320–D324.
- 1103 89. Orgambide GG, Huang Z-H, Gage DA, Dazzo FB. 1993. Phospholipid and  
1104 fatty acid compositions of *Rhizobium leguminosarum biovar trifolii* ANU843 in  
1105 relation to flavone-activated pSymnod gene expression. *Lipids* 28:975–979.
- 1106 90. Théberge M-C, Prévost D, Chalifour F-P. 1996. The effect of different  
1107 temperatures on the fatty acid composition of *Rhizobium leguminosarum* bv.  
1108 *viciae* in the faba bean symbiosis. *New Phytol* 134:657–664.
- 1109 91. diCenzo GC, Benedict AB, Fondi M, Walker GC, Finan TM, Mengoni A,  
1110 Griffiths JS. 2018. Robustness encoded across essential and accessory  
1111 replicons of the ecologically versatile bacterium *Sinorhizobium meliloti*. *PLoS*  
1112 *Genet* 14:e1007357.
- 1113 92. Breedveld MW, Miller KJ. 1994. Cyclic beta-glucans of members of the family  
1114 Rhizobiaceae. *Microbiol Rev* 58:145-161.
- 1115 93. Xavier JC, Patil KR, Rocha I. 2017. Integration of biomass formulations of  
1116 genome-scale metabolic models with experimental data reveals universally  
1117 essential cofactors in prokaryotes. *Metab Eng* 39:200-208.
- 1118 94. Ludwig EM, Leonard M, Marroqui S, Wheeler TR, Findlay K, Downie JA, Poole  
1119 PS. 2005. Role of polyhydroxybutyrate and glycogen as carbon storage  
1120 compounds in pea and bean bacteroids. *Mol Plant-Microbe Interact* 18:67–74.
- 1121 95. Heirendt L, Arreckx S, Pfau T, Mendoza SN, Richelle A, Heinken A,  
1122 Haraldsdóttir HS, Wachowiak J, Keating SM, Vlasov V, Magnúsdóttir S, Ng  
1123 CY, Preciat G, Žagare A, Chan SHJ, Aurich MK, Clancy CM, Modamio J,  
1124 Sauls JT, Noronha A, Bordbar A, Cousins B, El Assal DC, Valcarcel L V.,  
1125 Apaolaza I, Ghaderi S, Ahookhosh M, Ben Guebila M, Kostromins A,

- 1126 Sompairac N, Le HM, Ma D, Sun Y, Wang L, Yurkovich JT, Oliveira MAP,  
1127 Vuong PT, El Assal LP, Kuperstein I, Zinovyev A, Hinton HS, Bryant WA,  
1128 Aragón Artacho FJ, Planes FJ, Stalidzans E, Maass A, Vempala S, Hucka M,  
1129 Saunders MA, Maranas CD, Lewis NE, Sauter T, Palsson BØ, Thiele I,  
1130 Fleming RMT. 2019. Creation and analysis of biochemical constraint-based  
1131 models using the COBRA Toolbox v.3.0. *Nat Protoc* 14:639–702.
- 1132 96. Glenn AR, Dilworth MJ. 1981. Oxidation of substrates by isolated bacteroids  
1133 and free-living cells of *Rhizobium leguminosarum* 3841. *Microbiology* 126:243–  
1134 247.
- 1135 97. Galardini M, Mengoni A, Biondi EG, Semeraro R, Florio A, Bazzicalupo M,  
1136 Benedetti A, Mocali S. 2014. DuctApe: A suite for the analysis and correlation  
1137 of genomic and OmniLog™ Phenotype Microarray data. *Genomics* 103:1–10.
- 1138 98. Martin M. 2011. Cutadapt removes adapter sequences from high-throughput  
1139 sequencing reads. *EMBnet.journal* 17:10-12.
- 1140 99. Magoc T, Wood D, Salzberg SL. 2013. EDGE-pro: Estimated degree of gene  
1141 expression in prokaryotic genomes. *Evol Bioinform Online* 9:127–136.
- 1142 100. Robinson JT, Thorvaldsdóttir H, Winckler W, Guttman M, Lander ES, Getz G,  
1143 Mesirov JP. 2011. Integrative genomics viewer. *Nat Biotechnol* 29:24–26.

1144 **Data availability**

1145 All data need to evaluate the conclusions in this paper are present in the paper  
1146 and/or the Supplementary Materials. RNA-Seq data for Rlv3841 in the pea  
1147 rhizosphere are available on the NCBI SRA database, BioProject number  
1148 PRJNA748006. All code is available on Github  
1149 (<https://github.com/CarolinSchulte/Rlv3481-lifestyles>).

1150

1151 **Acknowledgements**

1152 This work was supported by funding from the Biotechnology and Biological Sciences  
1153 Research Council (BBSRC) [grant numbers BB/M011224/1, BB/R017859/1,  
1154 BB/T001801/1 and BB/T006722/1]. C.C.M.S. is supported by the Clarendon Fund  
1155 (Oxford University) and the Keble College De Breyne Scholarship. A.P. was funded  
1156 in part by the Engineering and Physical Sciences Research Council (EPSRC) [grant  
1157 number EP/M002454/1].

1158

1159 **Author contributions**

1160 Conceptualization: CCMS, AP, PSP

1161 Methodology: CCMS, AP, PSP

1162 Formal analysis: CCMS, VKR

1163 Investigation: CCMS, VKR, AP, PSP

1164 Visualization: CCMS

1165 Supervision: AP, PSP

1166 Writing—original draft: CCMS

1167 Writing—review & editing: CCMS, VKR, AP, PSP

## **Supplementary Data**

Supplementary Data 1: sbml file of iCS1224

Supplementary Data 2: Excel file of iCS1224

Supplementary Data 3: MEMOTE report for iCS1224

Supplementary Data 4: Phenotype microarray data for Rlv3841

Supplementary Data 5: RNA-Seq data for Rlv3841 in the pea rhizosphere

Supplementary Data 6: Rhizosphere model of Rlv3841

Supplementary Data 7: Metabolomics data

Supplementary Data 8: Nodule bacteria model of Rlv3841

Supplementary Data 9: Bacteroid model of Rlv3841

**Table 1: Properties of iCS1224.**

| <b>Feature</b>                                                                         | <b>Value</b> |
|----------------------------------------------------------------------------------------|--------------|
| Genes                                                                                  | 1224         |
| Metabolites                                                                            | 984          |
| Unique EC identifiers                                                                  | 603          |
| Reactions                                                                              | 1257         |
| Metabolic reactions                                                                    | 913          |
| Gene-associated metabolic reactions                                                    | 897          |
| Transport reactions                                                                    | 162          |
| Gene-associated transport reactions                                                    | 142          |
| Sink reactions                                                                         | 155          |
| Demand reactions                                                                       | 15           |
| Other reactions (e.g. DNA synthesis,<br>protein synthesis, biomass objective function) | 12           |

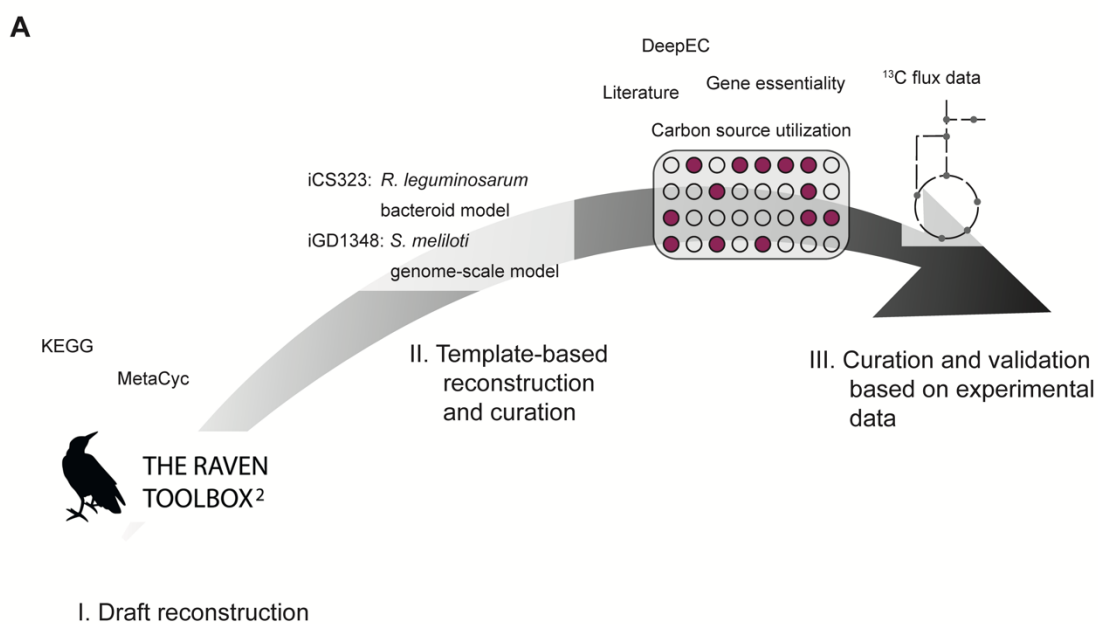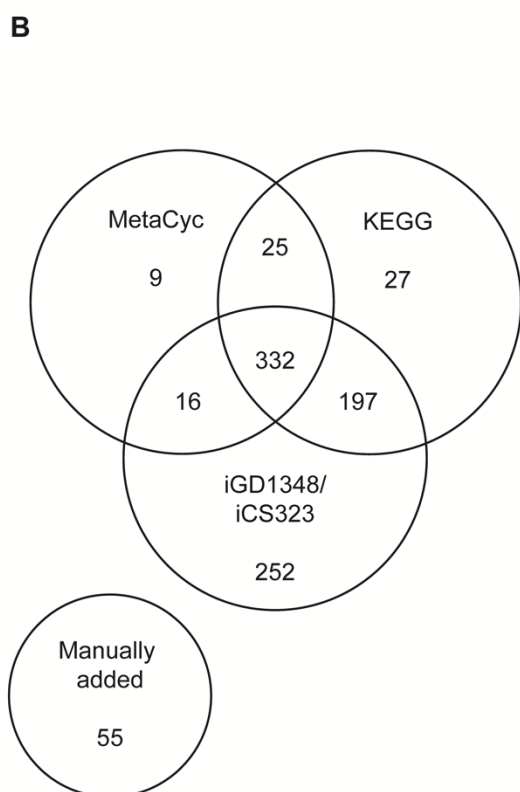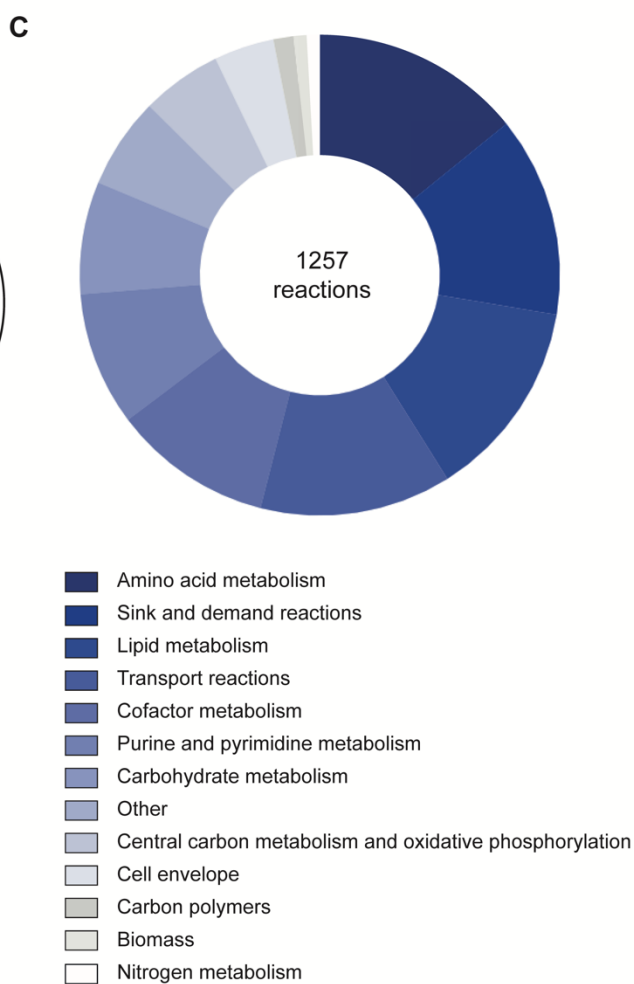

**Fig. 1: Reconstruction of a genome-scale model for *Rhizobium leguminosarum***

**bv. *viciae* 3841.** A: Reconstruction process for iCS1224 using automated reconstruction, template-based reconstruction, and data-based curation. B: Sources for the 913 metabolic reactions in iCS1224. Numbers indicate how many reactions from KEGG, MetaCyc or the template-based reconstruction were included in the final model, with numbers in the overlapping areas indicating reactions that were present in multiple draft reconstructions. C: Classification of the reactions in iCS1224.

**A** Carbon source utilization

|                  |           | Experimental         |                      |
|------------------|-----------|----------------------|----------------------|
|                  |           | Growth               | No growth            |
| <i>In silico</i> | Growth    | 80<br>True positives | 8<br>False positives |
|                  | No growth | 3<br>False negatives | 18<br>True negatives |

**B** Gene essentiality

|                  |               | Experimental          |                       |
|------------------|---------------|-----------------------|-----------------------|
|                  |               | Essential             | Non-essential         |
| <i>In silico</i> | Essential     | 431<br>True positives | 50<br>False positives |
|                  | Non-essential | 60<br>False negatives | 683<br>True negatives |

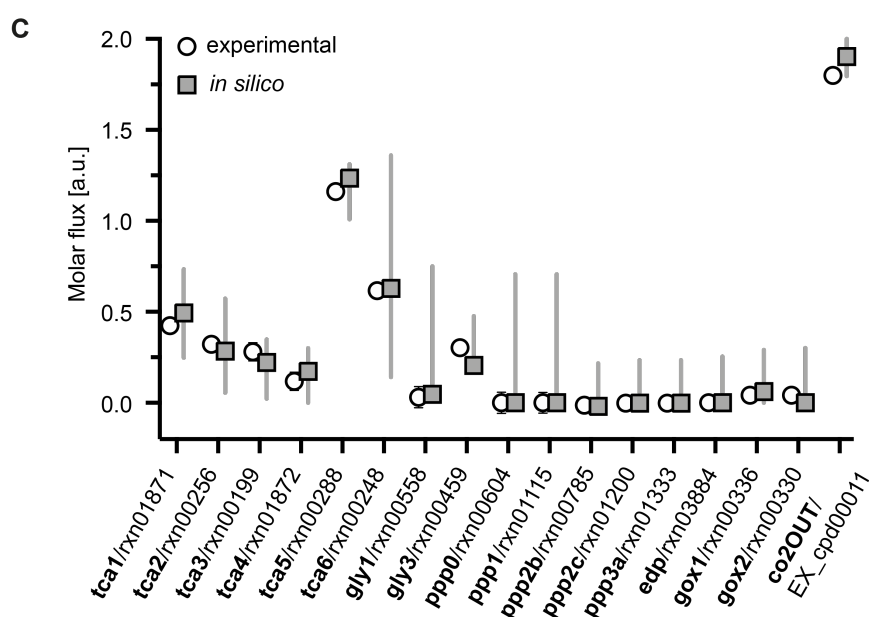

**Fig 2. Validation of iCS1224.** A: Table showing the agreement between carbon source utilization experimentally measured with phenotype microarrays and predicted by iCS1224. B: Table showing the agreement between gene essentiality determined by insertion sequencing (13, 30) and predicted by iCS1224. C: Comparison of metabolic fluxes determined by  $^{13}\text{C}$  metabolic flux analysis for Rlv3841 grown on succinate (40) with flux rates predicted by iCS1224. For experimental data, symbols and bars indicate mean  $\pm$  SD. Note the error bars are



too small to be visible for most data points. For *in silico* data, symbols represent the flux rate predicted by flux balance analysis, with lines indicating upper and lower bounds for each flux determined by flux variability analysis with at least 95% of the optimum flux through the biomass objective function. Labels on the x axis indicate the name of the reaction as reported in (40) (in bold), as well as the reaction identifier in the model.

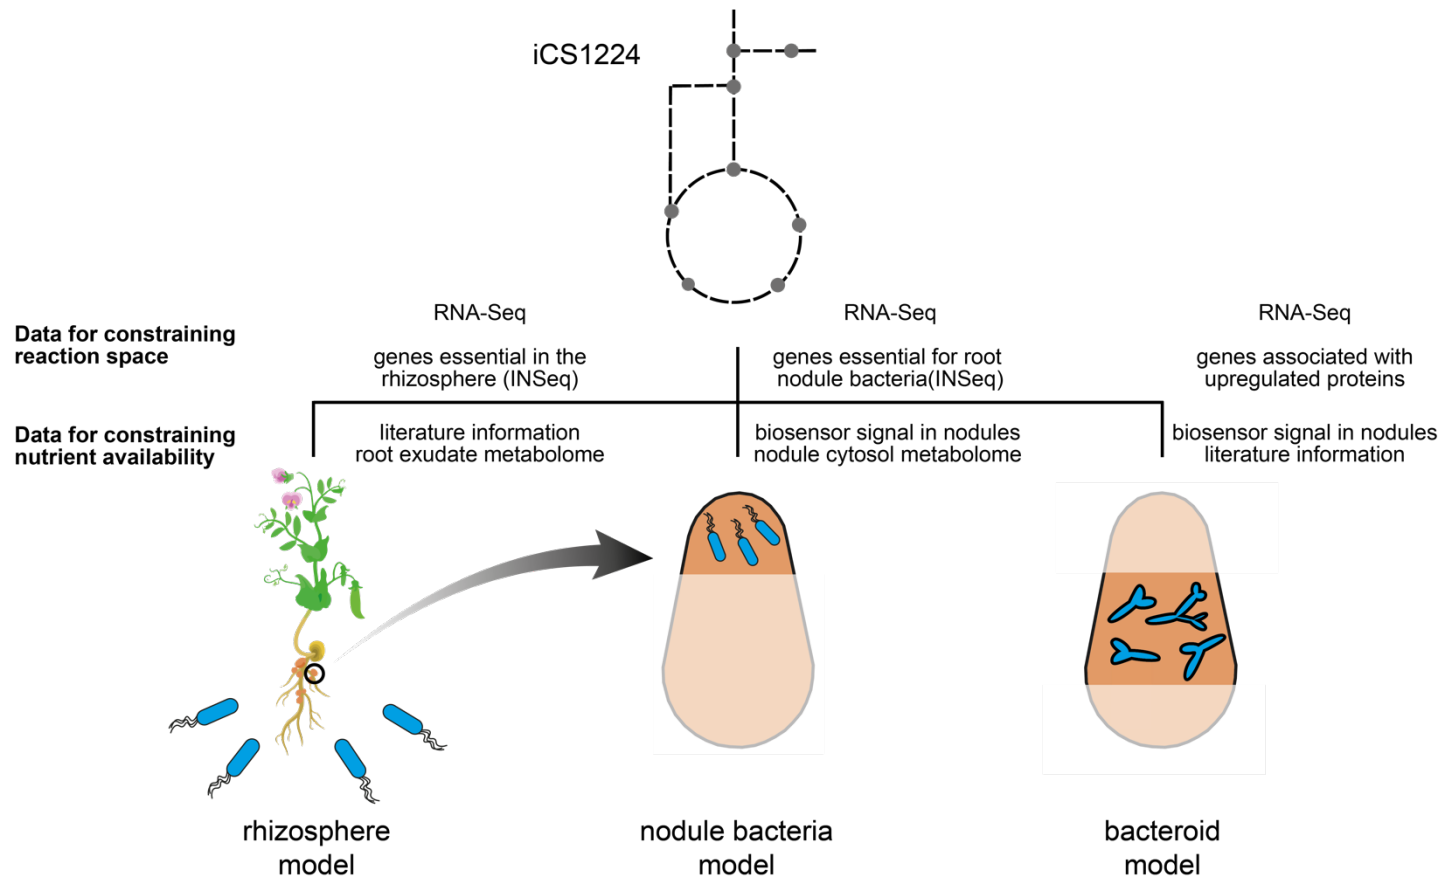

**Fig. 3: Approach for generating lifestyle-specific models for *Rhizobium leguminosarum* bv. *viciae*.** Based on iCS1224, transcriptome, gene essentiality and proteome data specific to a certain lifestyle were used to inform the extraction of context-specific models for the rhizosphere, nodule bacteria and nitrogen-fixing bacteroids. Boundary conditions were defined based on metabolome data and/or literature information.

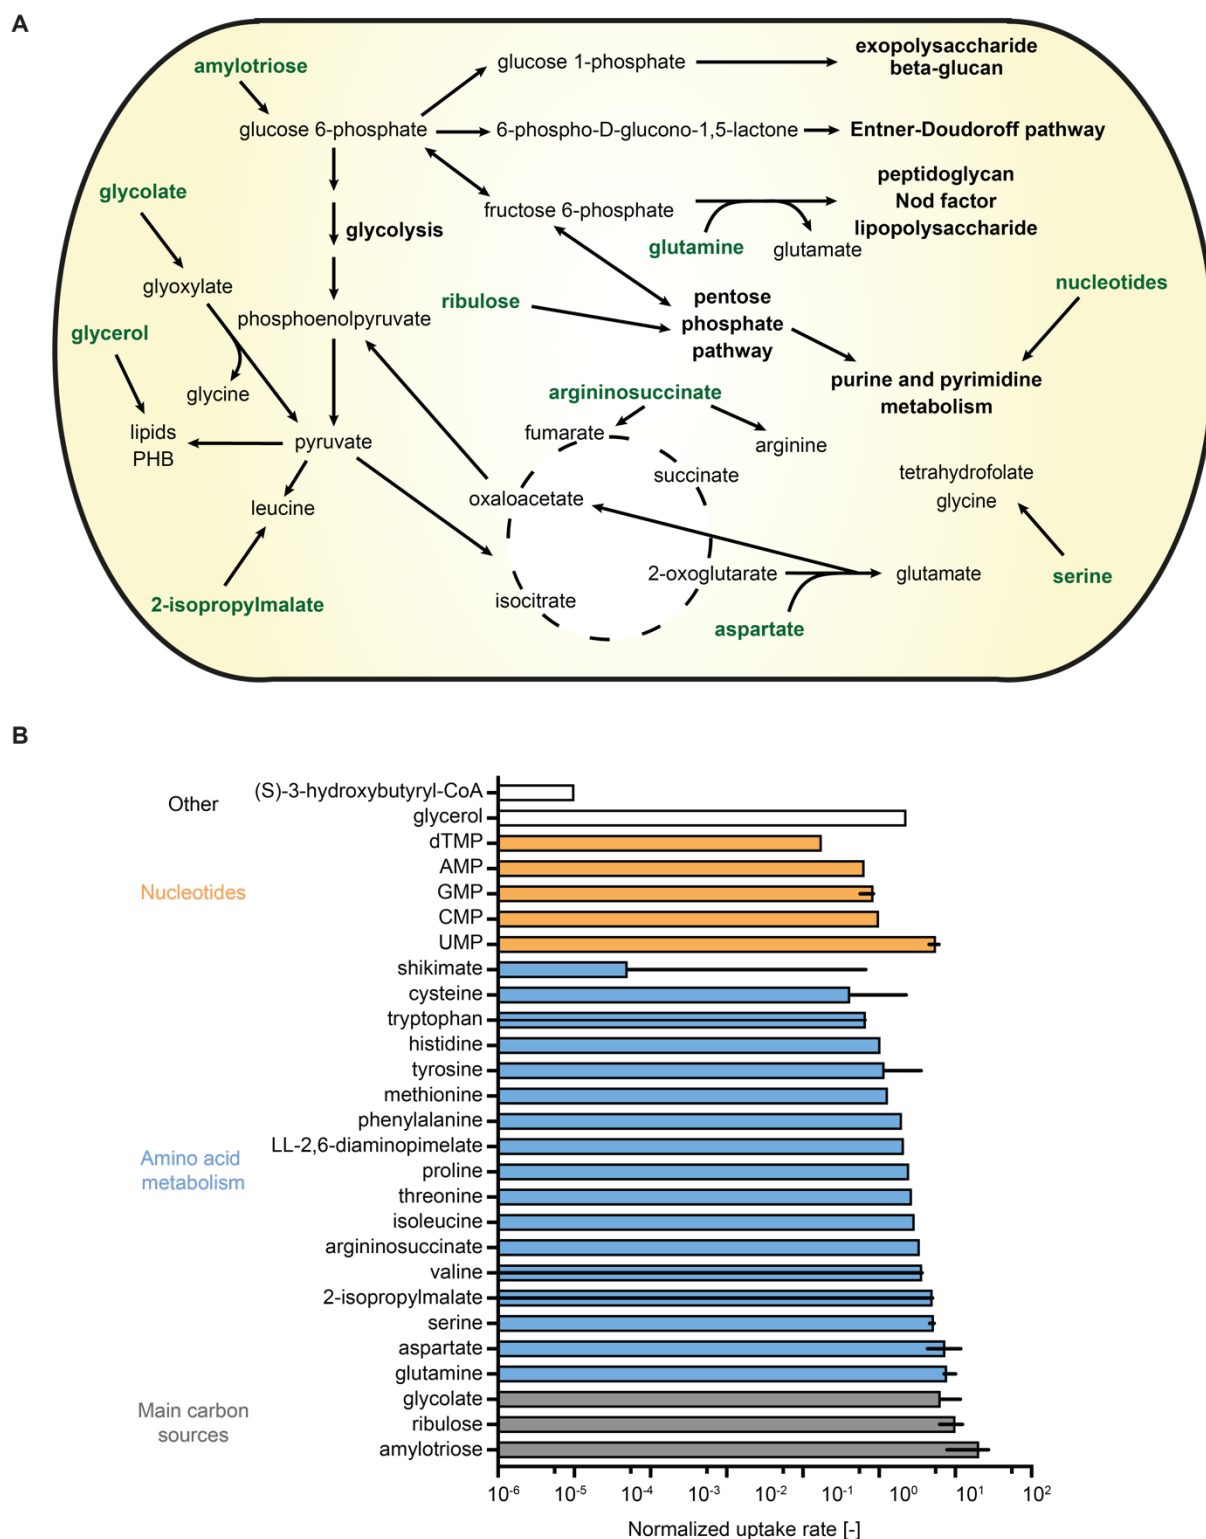

**Fig. 4: Metabolism of *Rhizobium leguminosarum* in the pea rhizosphere. A**

rhizosphere-specific model was extracted from iCS1224 using the RIPTiDe algorithm with RNA-Seq and gene essentiality data for *R. leguminosarum* in the rhizosphere of pea plants. A: Schematic representation of the main pathways predicted to be active

in the rhizosphere-specific model. Compounds predicted to be taken up are indicated in bold green. Note that the magnitude of flux is not indicated in this summary map.

B: Bar graph showing the uptake rates of metabolites predicted to be taken up from pea root exudate. Absolute flux values for the exchange reactions were normalized by flux through the biomass reaction in each sample. Only metabolites with non-zero median uptake for the 500 samples of the contextualized model are shown. Uptake of ions and cofactors has been omitted for clarity. Bars and lines indicate median and interquartile range, respectively.

**A Pea**

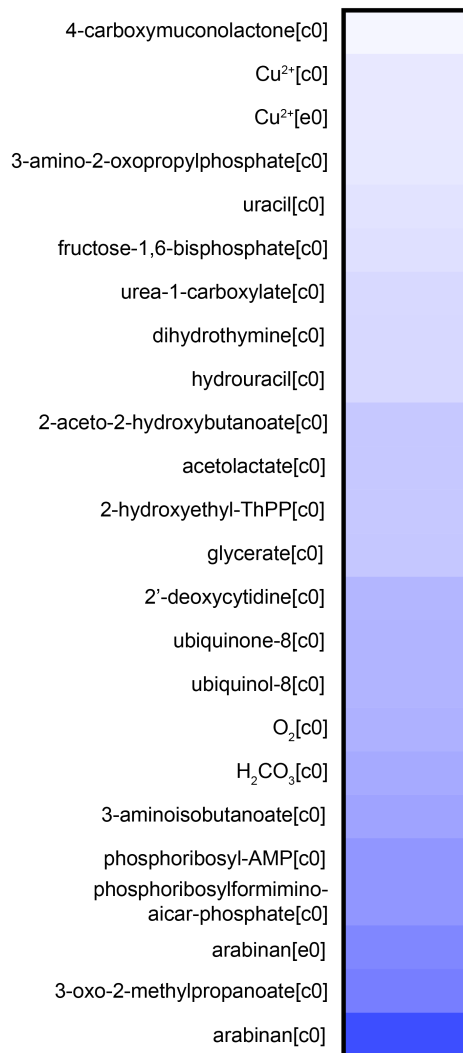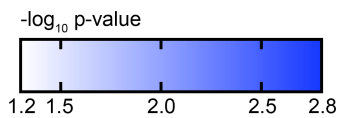

**B Alfalfa**

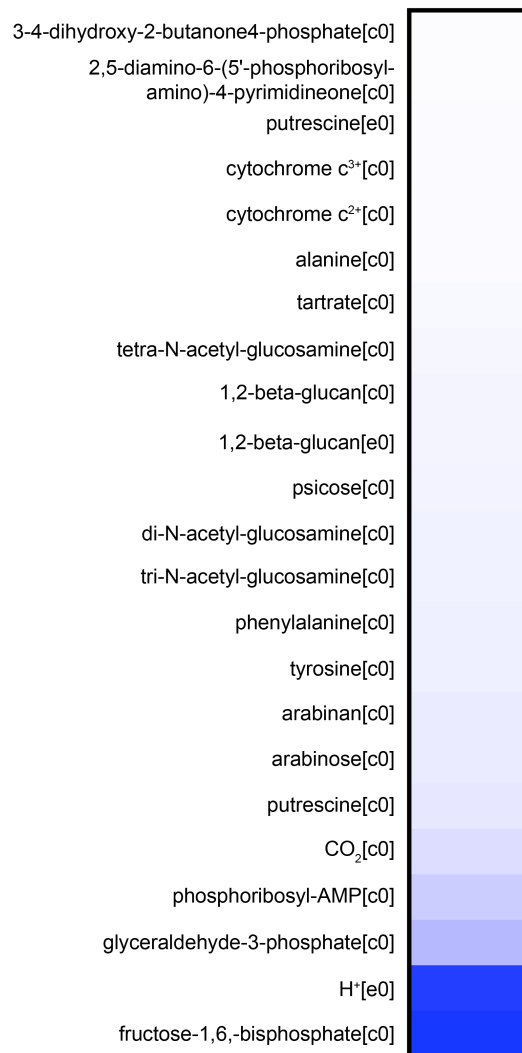

**C Sugar beet**

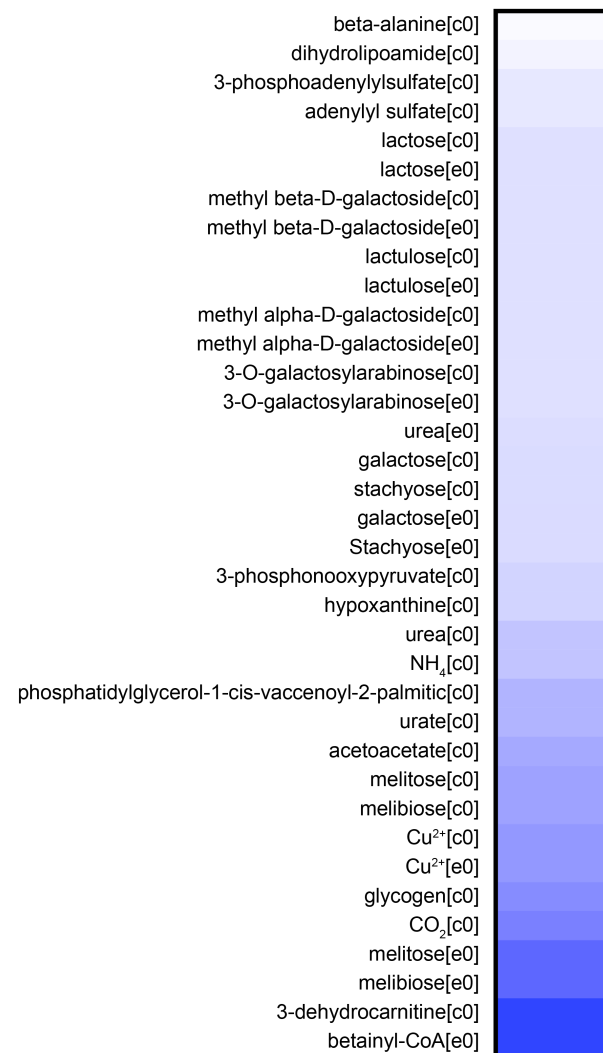

**Fig. 5: Reporter metabolites in different rhizospheres.** Reporter metabolites were calculated using microarray data for *Rhizobium leguminosarum* bv. *viciae* 3841 in the rhizosphere of pea (A), alfalfa (B), and sugar beet (C) compared to free living cells grown in minimal media with glucose and ammonia (10). The heatmaps show the negative decimal logarithm of the  $P$  value for those metabolites that were associated with significant ( $P < 0.05$ ) transcriptional changes among genes upregulated in the rhizosphere. [c0] and [e0] indicate cytosolic and extracellular metabolites, respectively.

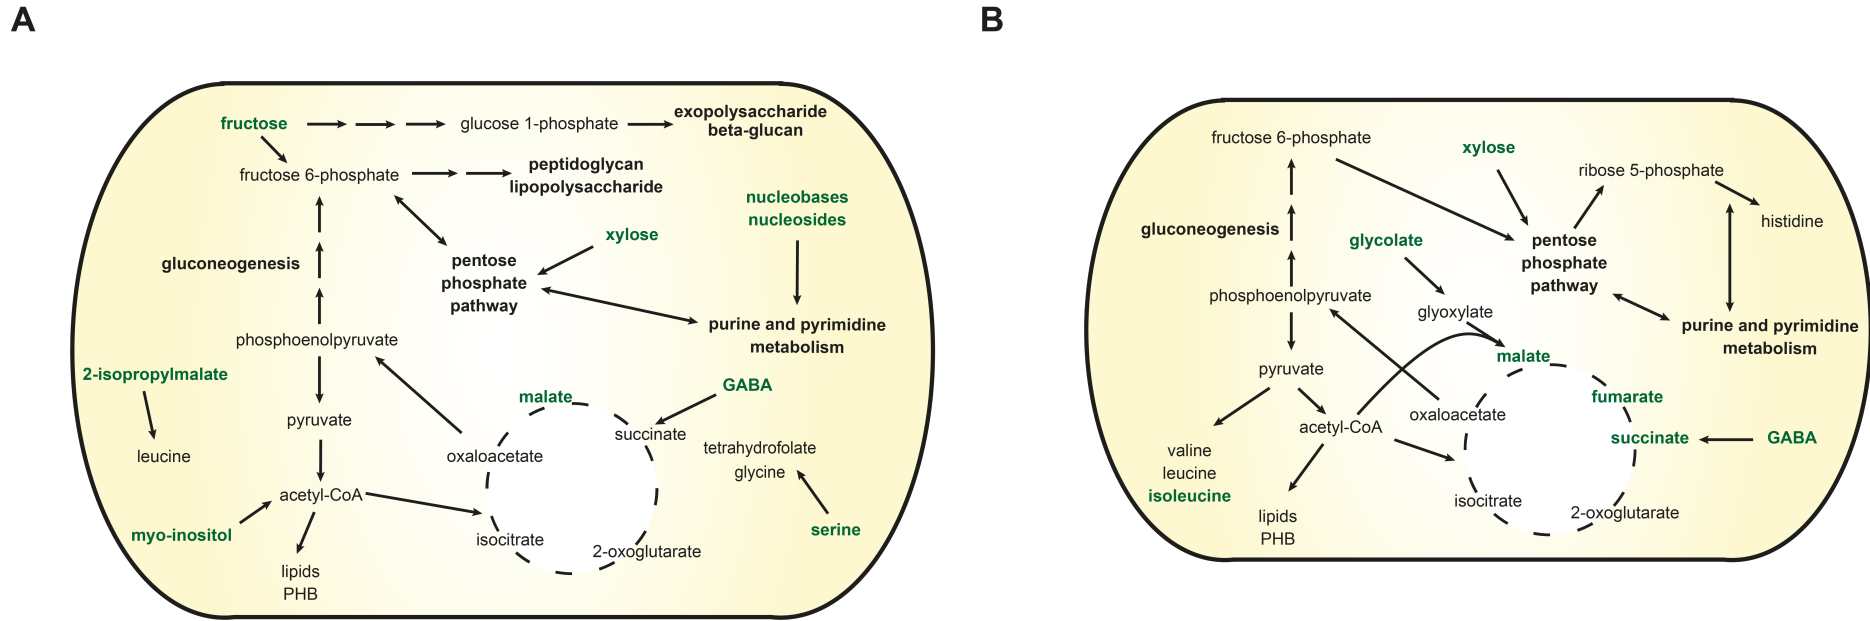

**Fig. 6: Metabolism of undifferentiated nodule bacteria and nitrogen-fixing bacteroids.** Maps showing schematic representations of the main pathways predicted to be active in undifferentiated nodule bacteria (A) and nitrogen-fixing bacteroids (B). Compounds predicted to be taken up are indicated in bold green. Note that the magnitude of flux is not indicated in these summary maps.
